# Supplementary material for: The Use of Microtechnology to Quantify the Peak Match Demands of the Football Codes: A Systematic Review
Source: Sports Med. 2018 Aug 7;48(11):2549–75. doi: 10.1007/s40279-018-0965-6 (PMC6182461; doi:10.1007/s40279-018-0965-6)

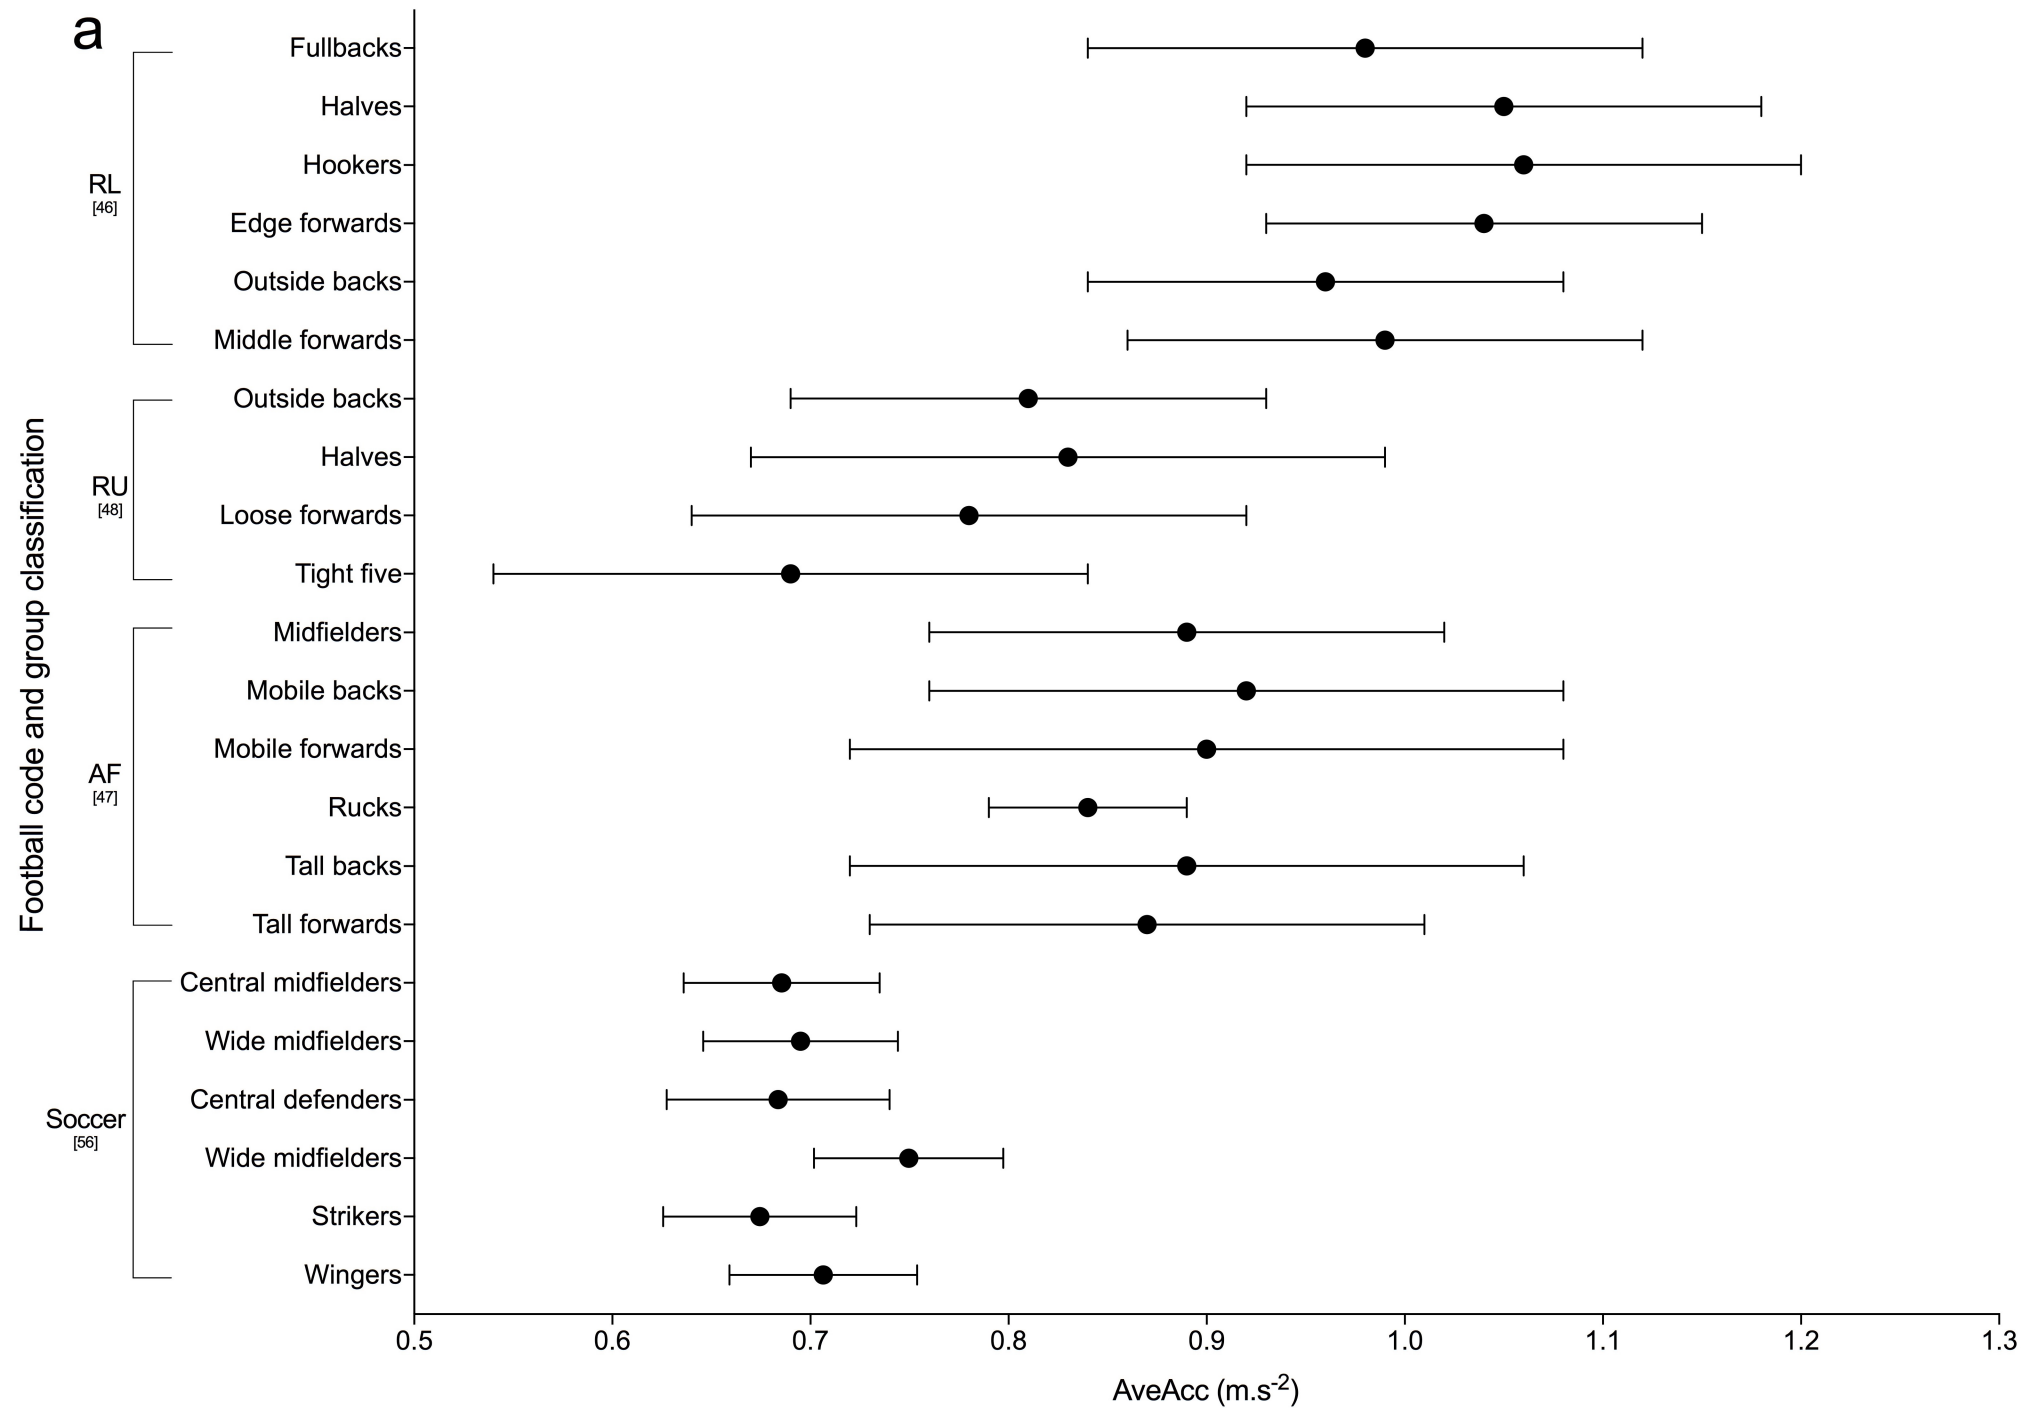

b

Football code and group classification

RL  
[46]

Fullbacks

Halves

Hookers

Edge forwards

Outside backs

Middle forwards

RU  
[48]

Outside backs

Halves

Loose forwards

Tight five

AF  
[47]

Midfielders

Mobile backs

Mobile forwards

Rucks

Tall backs

Tall forwards

Soccer  
[56]

Central midfielders

Wide midfielders

Central defenders

Wide midfielders

Strikers

Wingers

0.5

0.6

0.7

0.8

0.9

1.0

1.1

1.2

AveAcc ( $\text{m.s}^{-2}$ )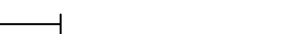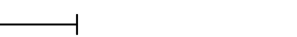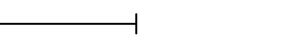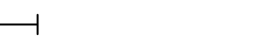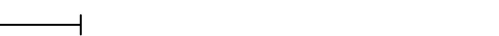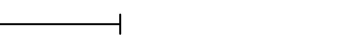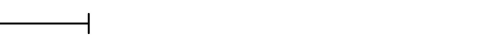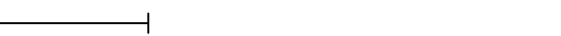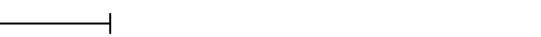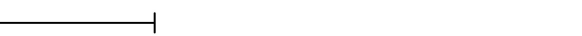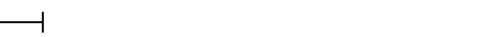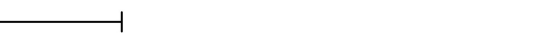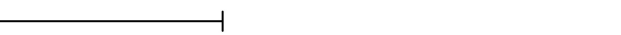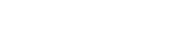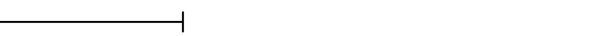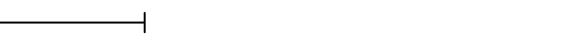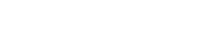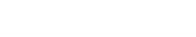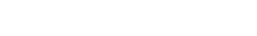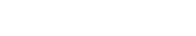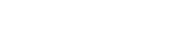

C

Football code and group classification

RL  
[46]RU  
[48]AF  
[47]Soccer  
[56]

Fullbacks

Halves

Hookers

Edge forwards

Outside backs

Middle forwards

Outside backs

Halves

Loose forwards

Tight five

Midfielders

Mobile backs

Mobile forwards

Rucks

Tall backs

Tall forwards

Central midfielders

Wide midfielders

Central defenders

Wide midfielders

Strikers

Wingers

0.4

0.5

0.6

0.7

0.8

0.9

1.0

1.1

AveAcc ( $\text{m.s}^{-2}$ )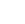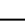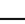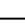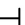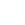

d

Football code and group classification

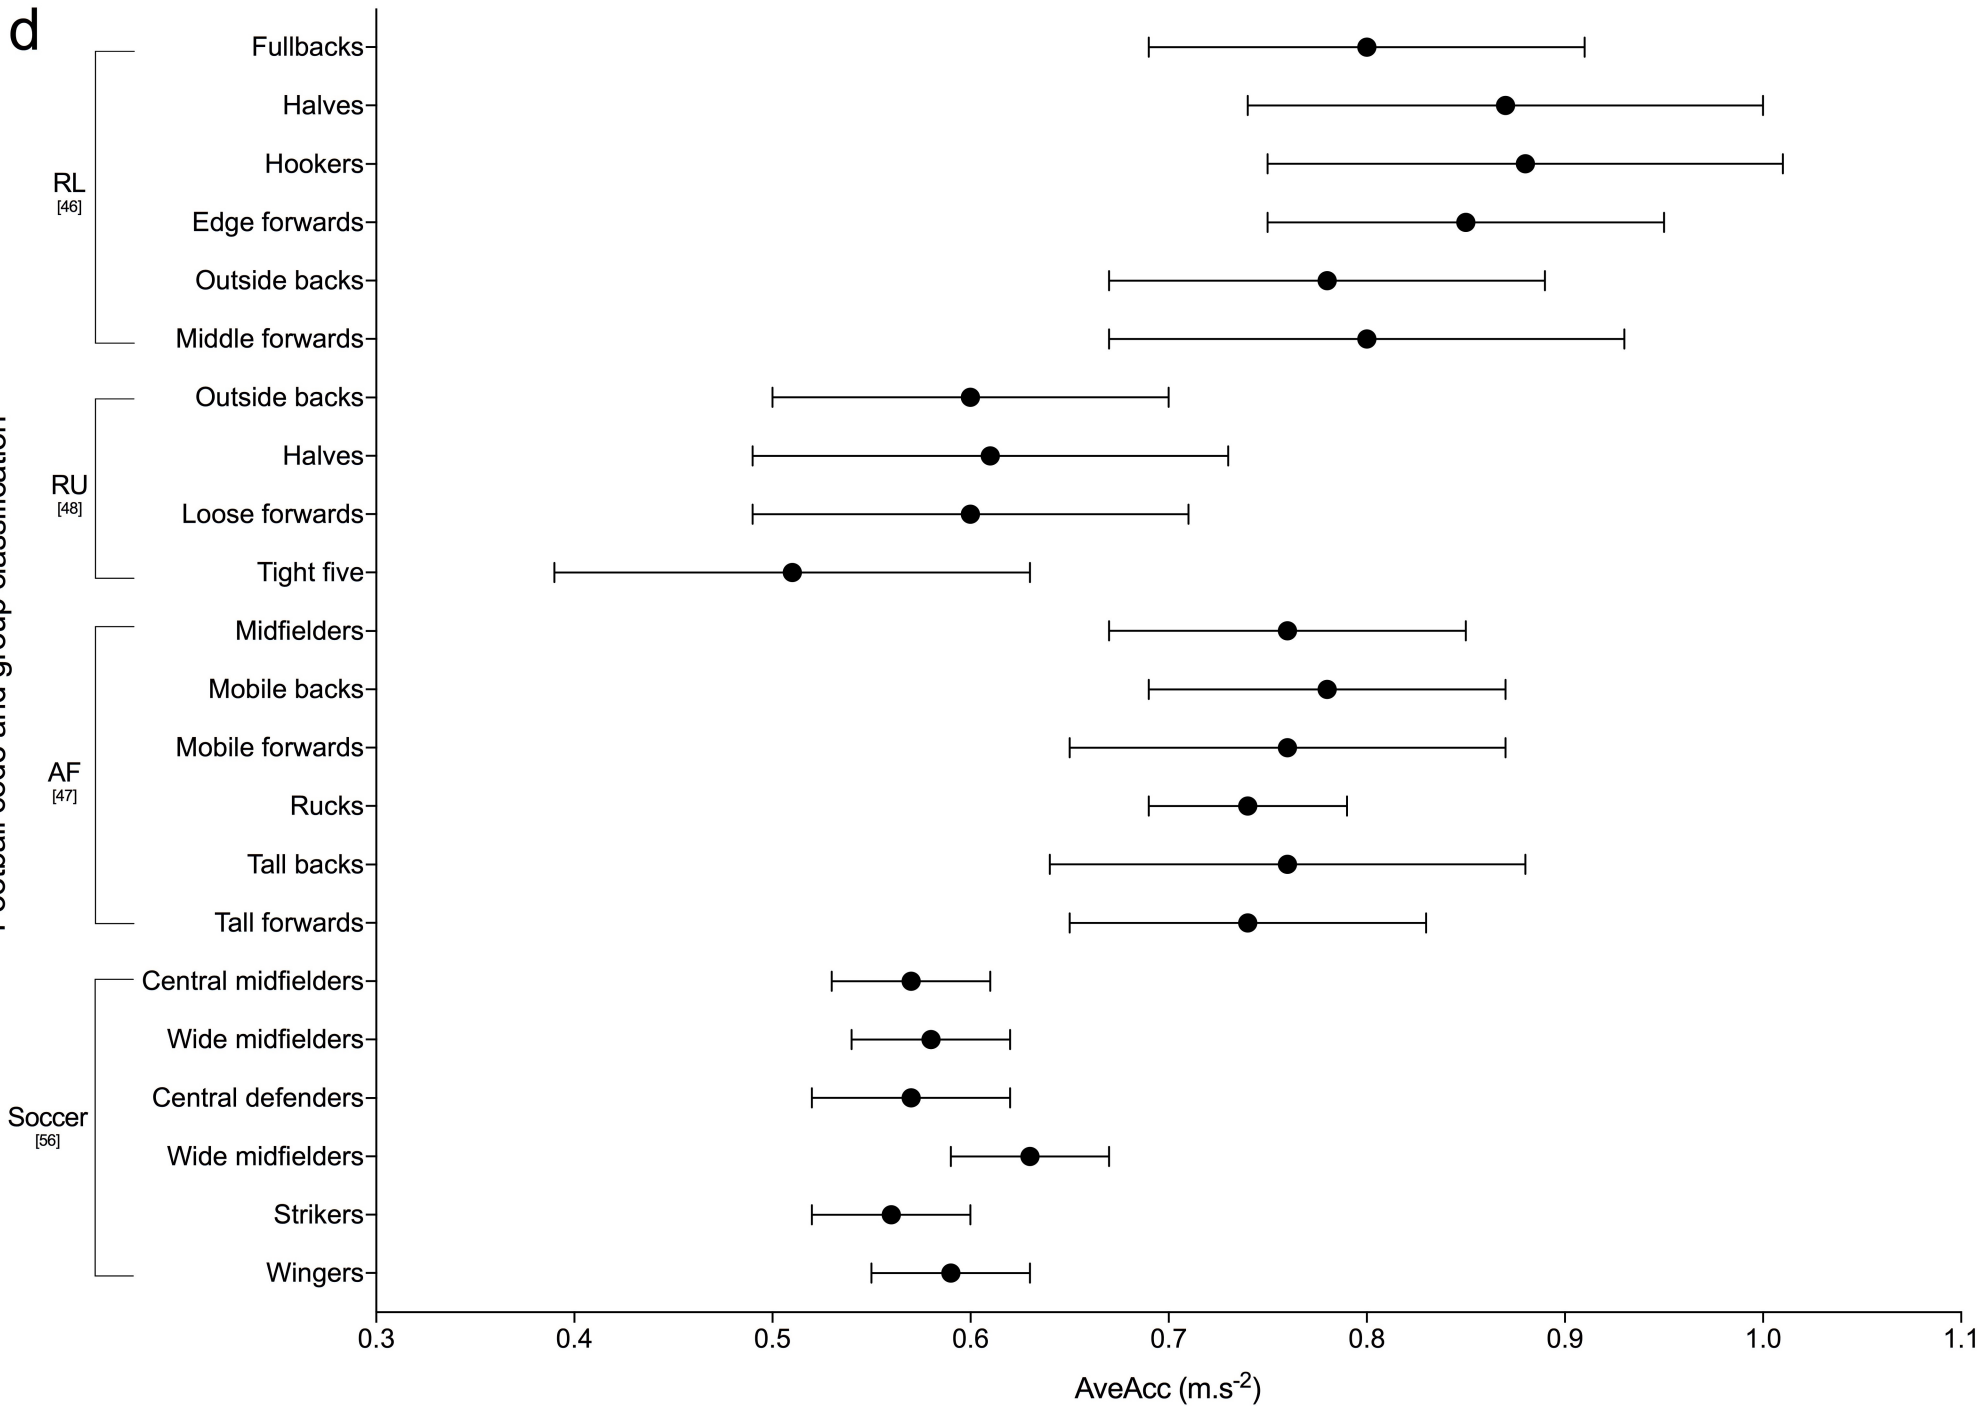

e

RL  
[46]RU  
[48]AF  
[47]Soccer  
[56]

Fullbacks

Halves

Hookers

Edge forwards

Outside backs

Middle forwards

Outside backs

Halves

Loose forwards

Tight five

Midfielders

Mobile backs

Mobile forwards

Rucks

Tall backs

Tall forwards

Central midfielders

Wide midfielders

Central defenders

Wide midfielders

Strikers

Wingers

0.3

0.4

0.5

0.6

0.7

0.8

0.9

1.0

AveAcc ( $\text{m.s}^{-2}$ )

●

●

●

●

●

●

●

●

●

●

●

●

●

●

●

●

●

●

●

●

●

●

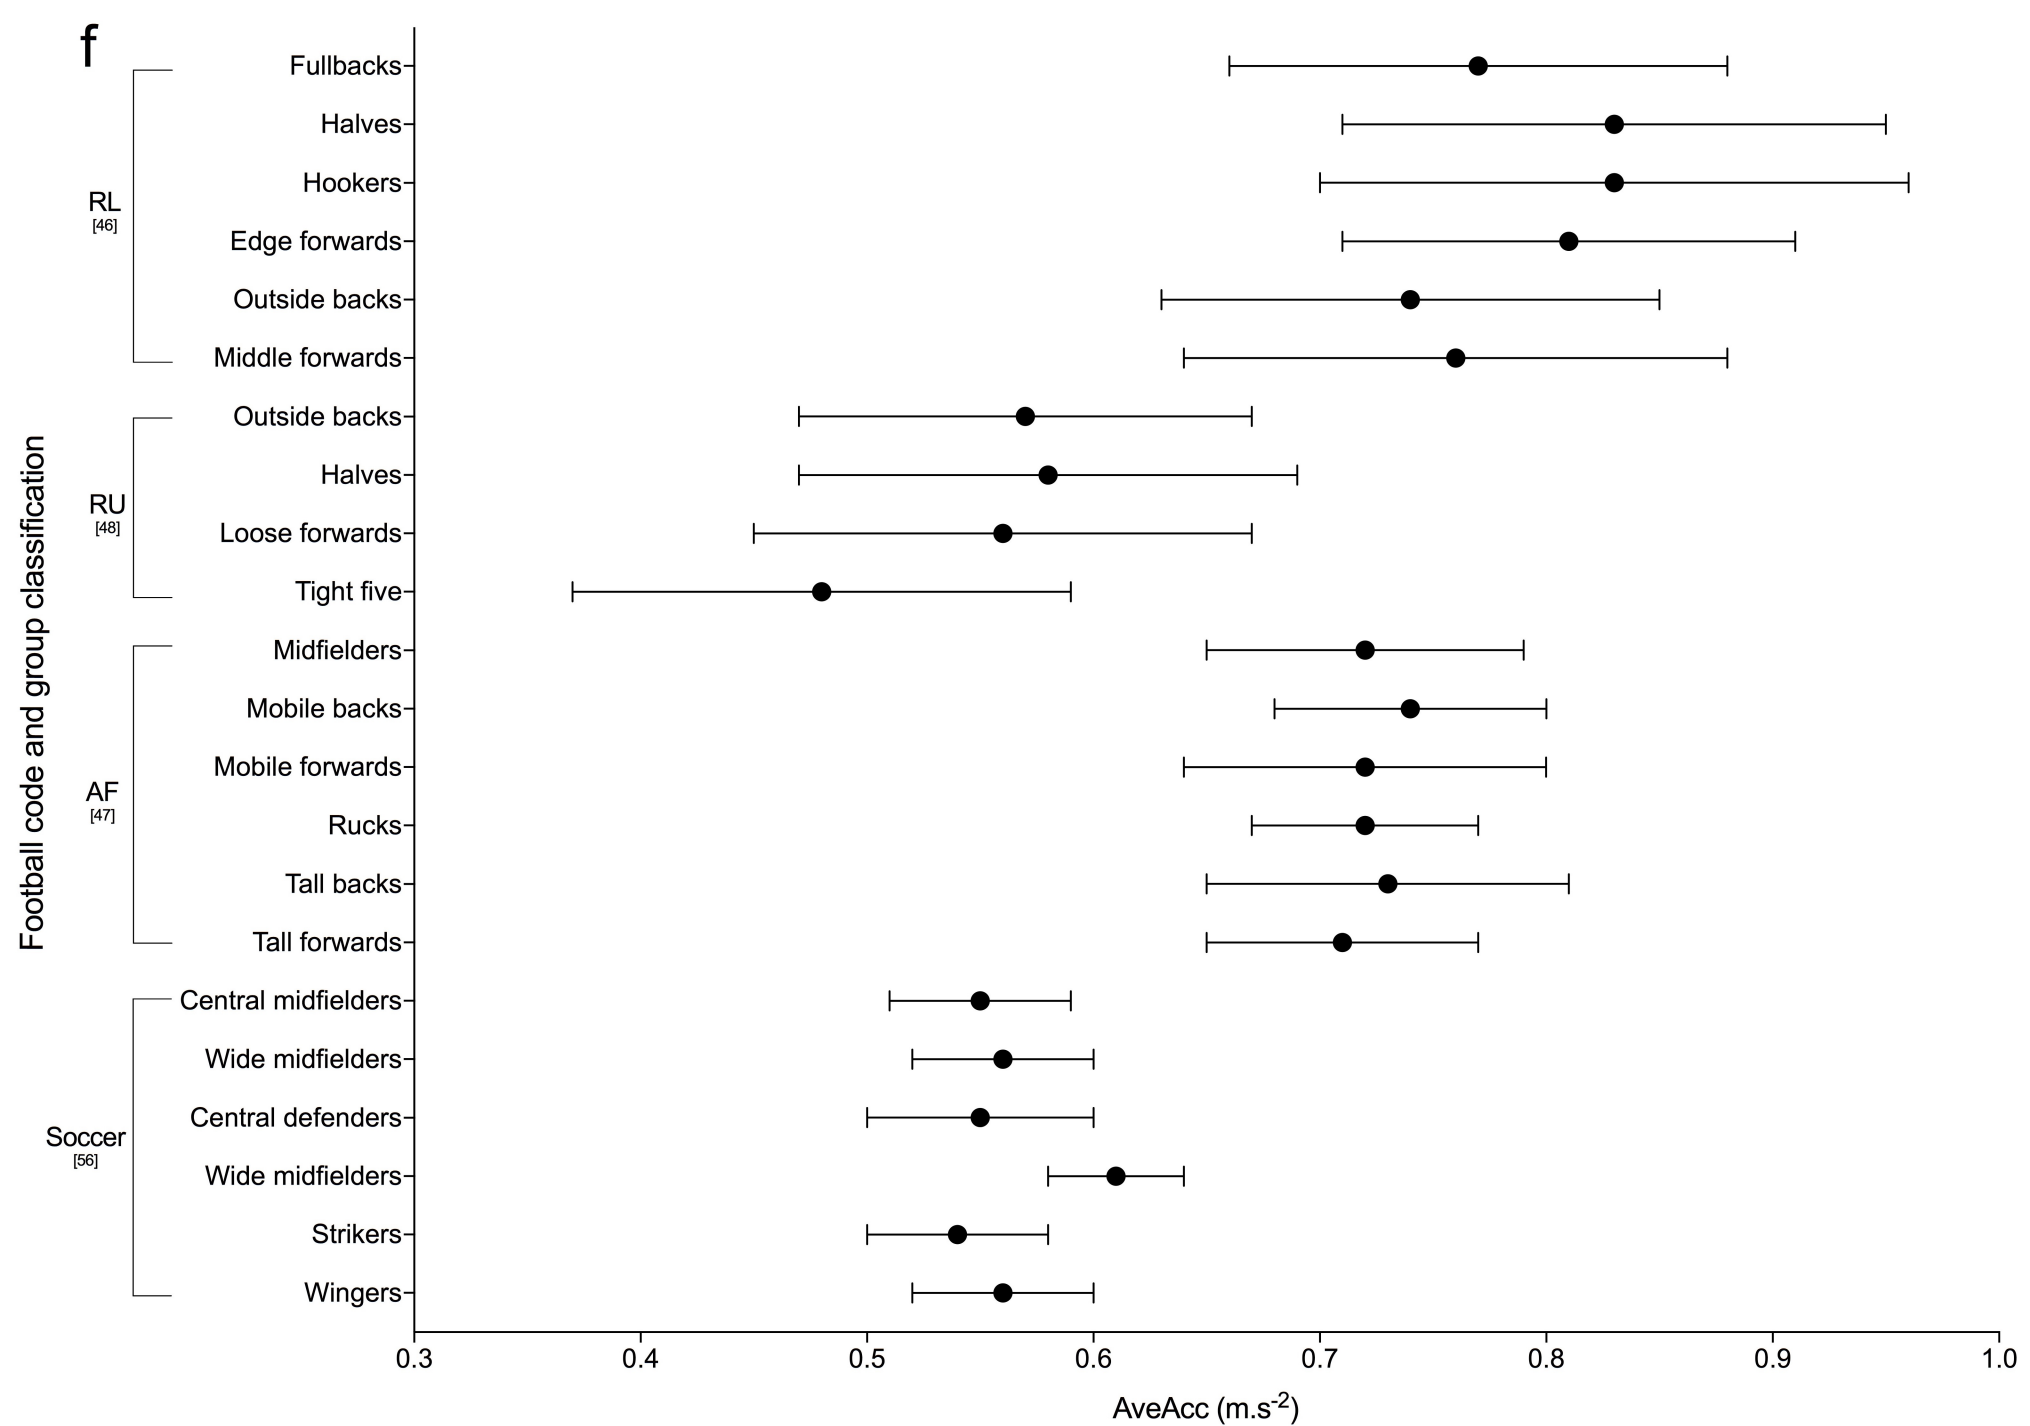

g

RL  
[46]RU  
[48]AF  
[47]Soccer  
[56]

Fullbacks

Halves

Hookers

Edge forwards

Outside backs

Middle forwards

Outside backs

Halves

Loose forwards

Tight five

Midfielders

Mobile backs

Mobile forwards

Rucks

Tall backs

Tall forwards

Central midfielders

Wide midfielders

Central defenders

Wide midfielders

Strikers

Wingers

0.3

0.4

0.5

0.6

0.7

0.8

0.9

1.0

AveAcc (m.s<sup>-2</sup>)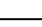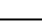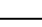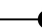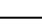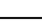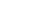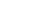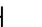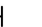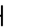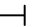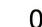

Supplement: Supplementary file 2 — Figure S2. Duration specific peak average absolute acceleration/deceleration (AveAcc; m·s-2) in the football codes. a = 2-minutes, b = 3-minutes, c = 4-minutes, d = 6-minutes, e = 7-minutes, f = 8-minutes, g = 9-minutes. Data expressed as mean ± SD. RL = rugby league, RU = rugby union, AF = Australian Football [file 40279_2018_965_MOESM2_ESM.pdf]
