# Supplementary material for: The Use of Microtechnology to Quantify the Peak Match Demands of the Football Codes: A Systematic Review
Source: PubMed Central journal article supplement (PMC6182461; doi:10.1007/s40279-018-0965-6), 2018-08-07

**a**

Football code and group classification

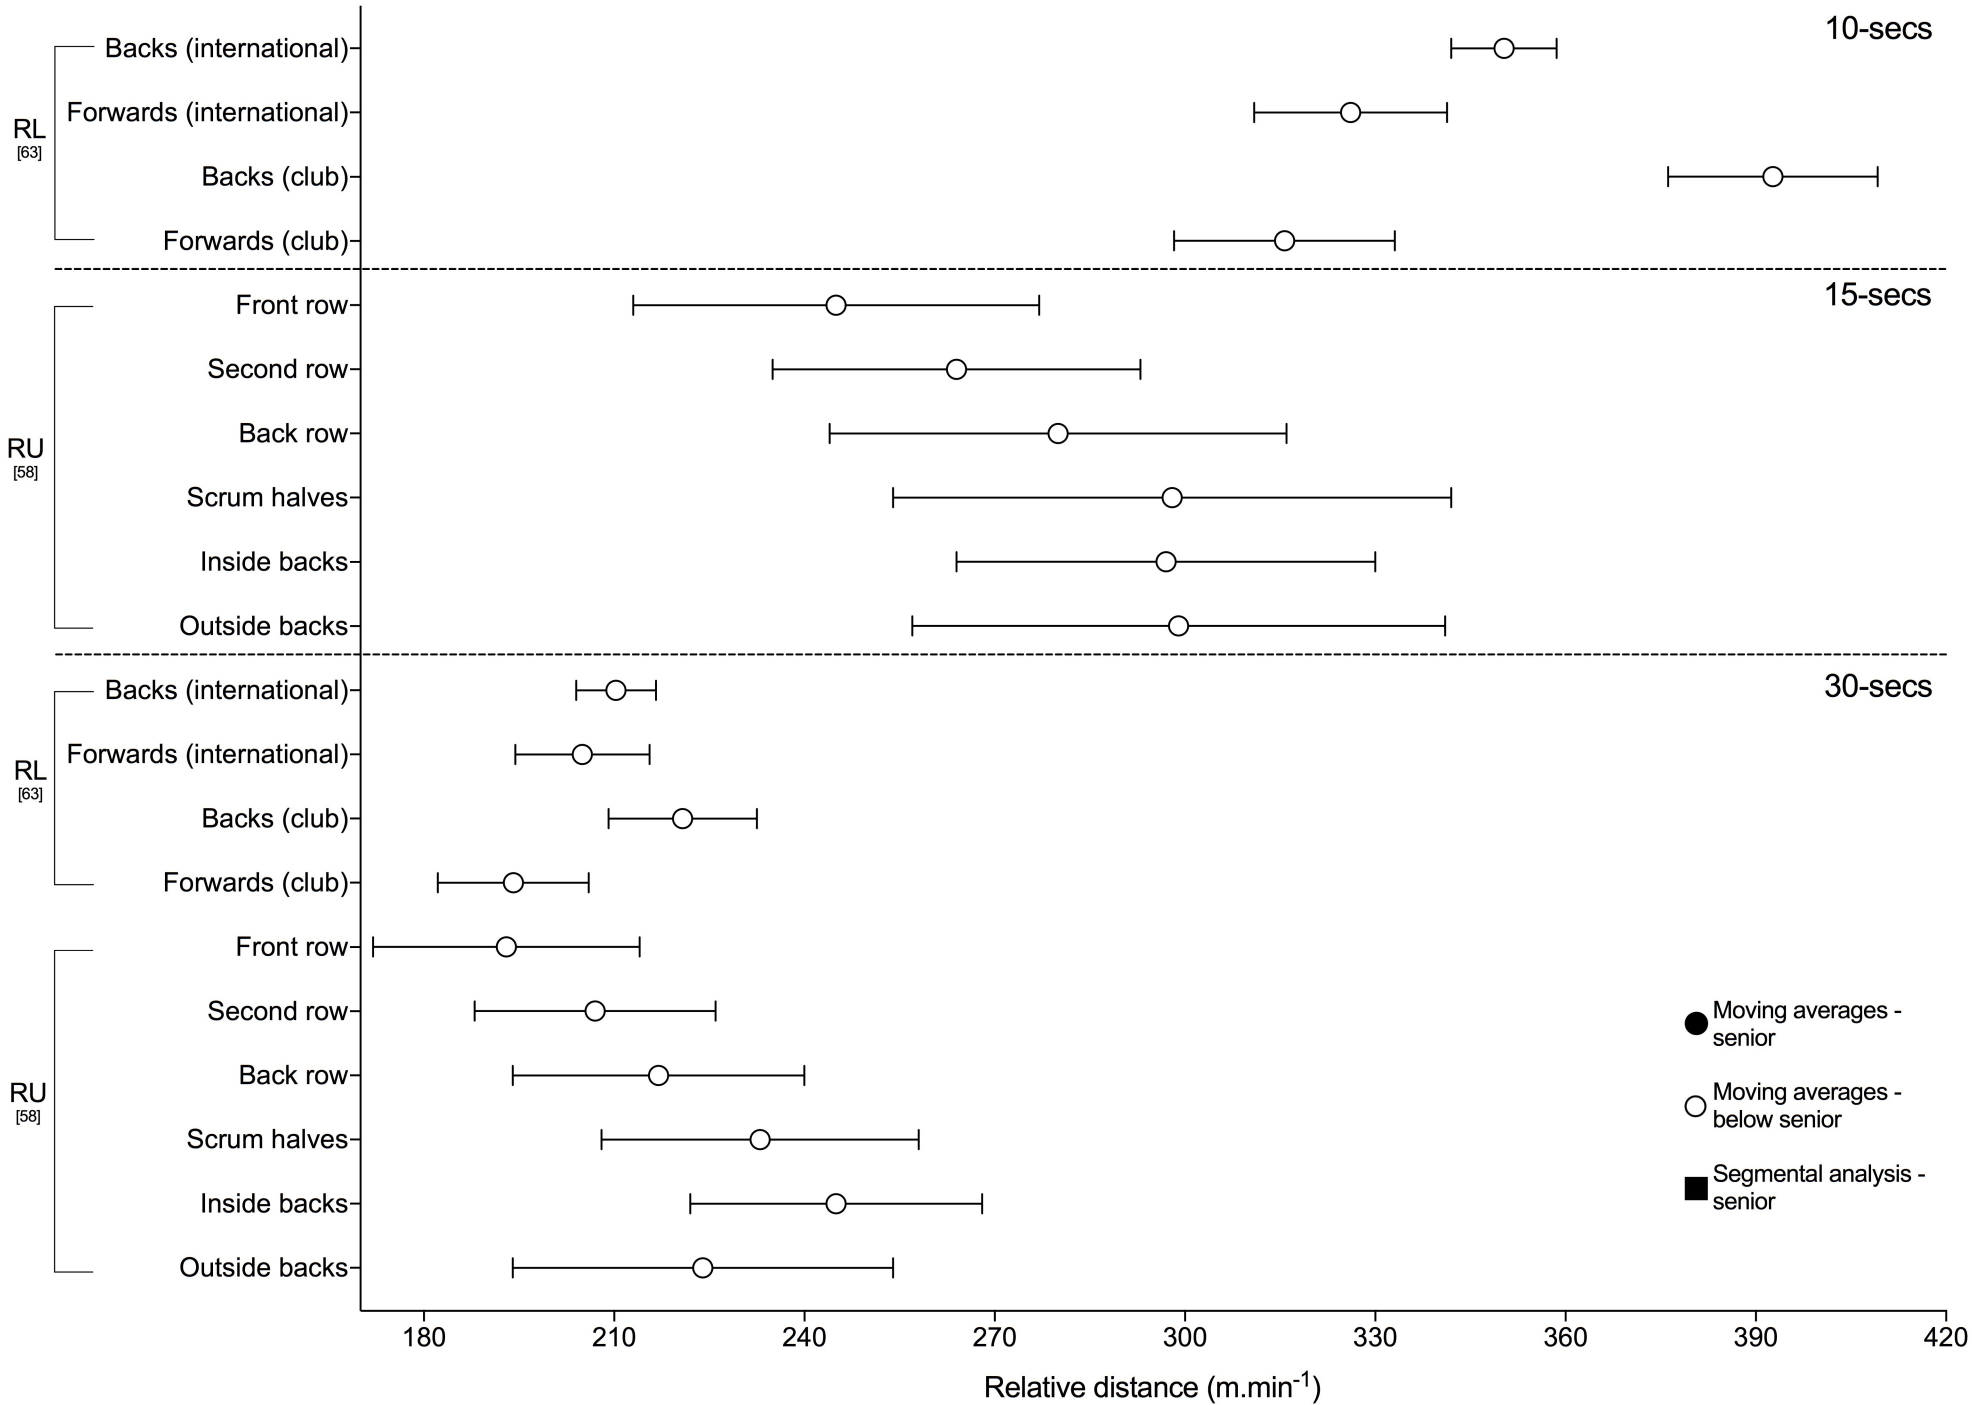

**b**

Football code and group classification

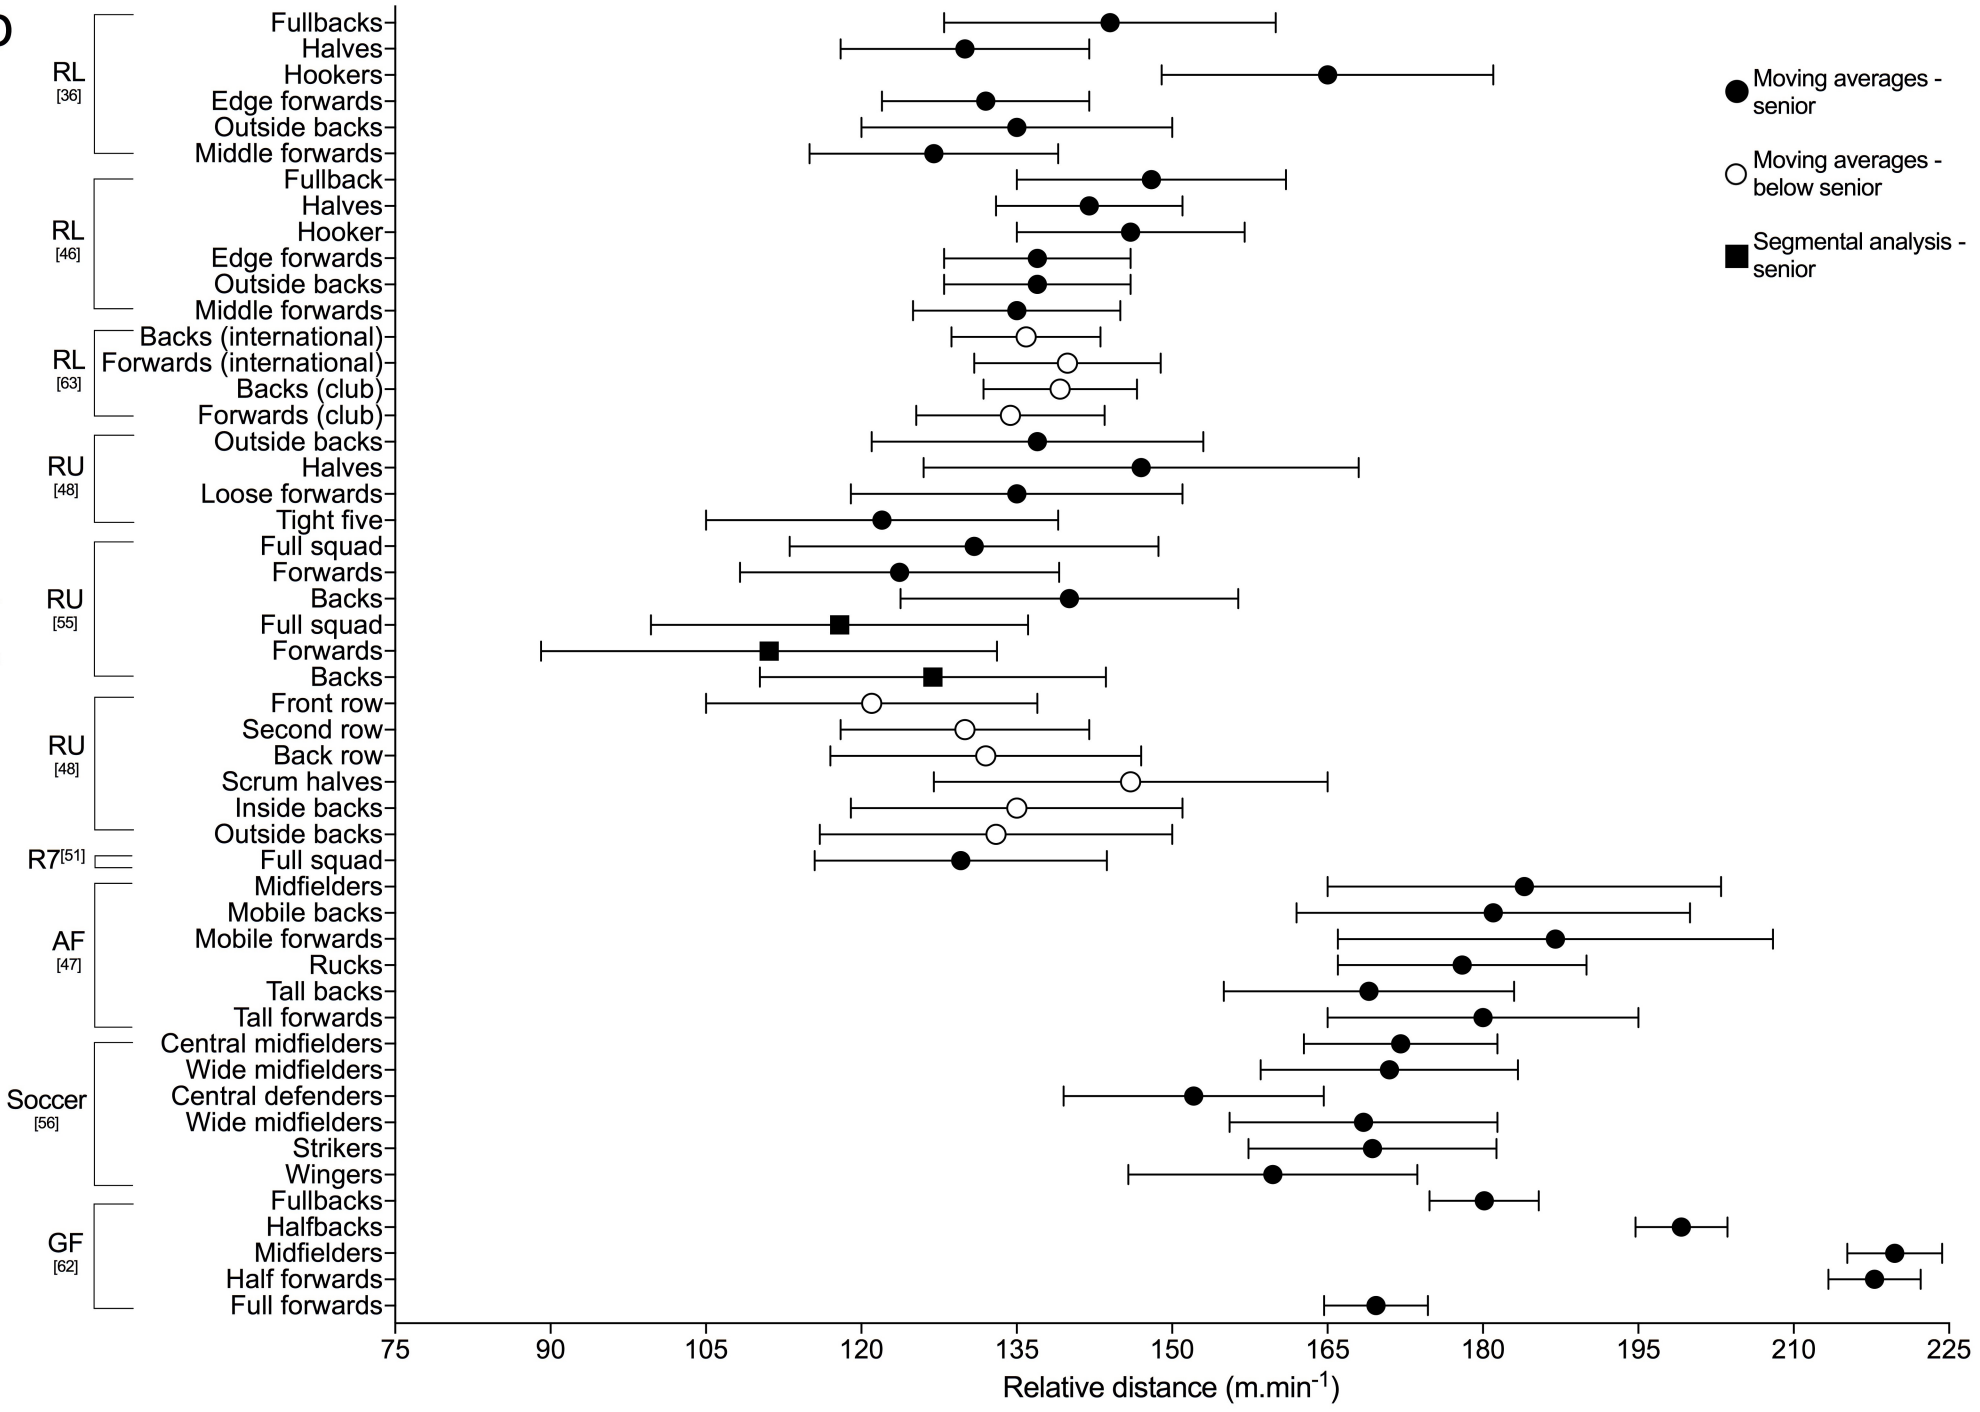

C

Football code and group classification

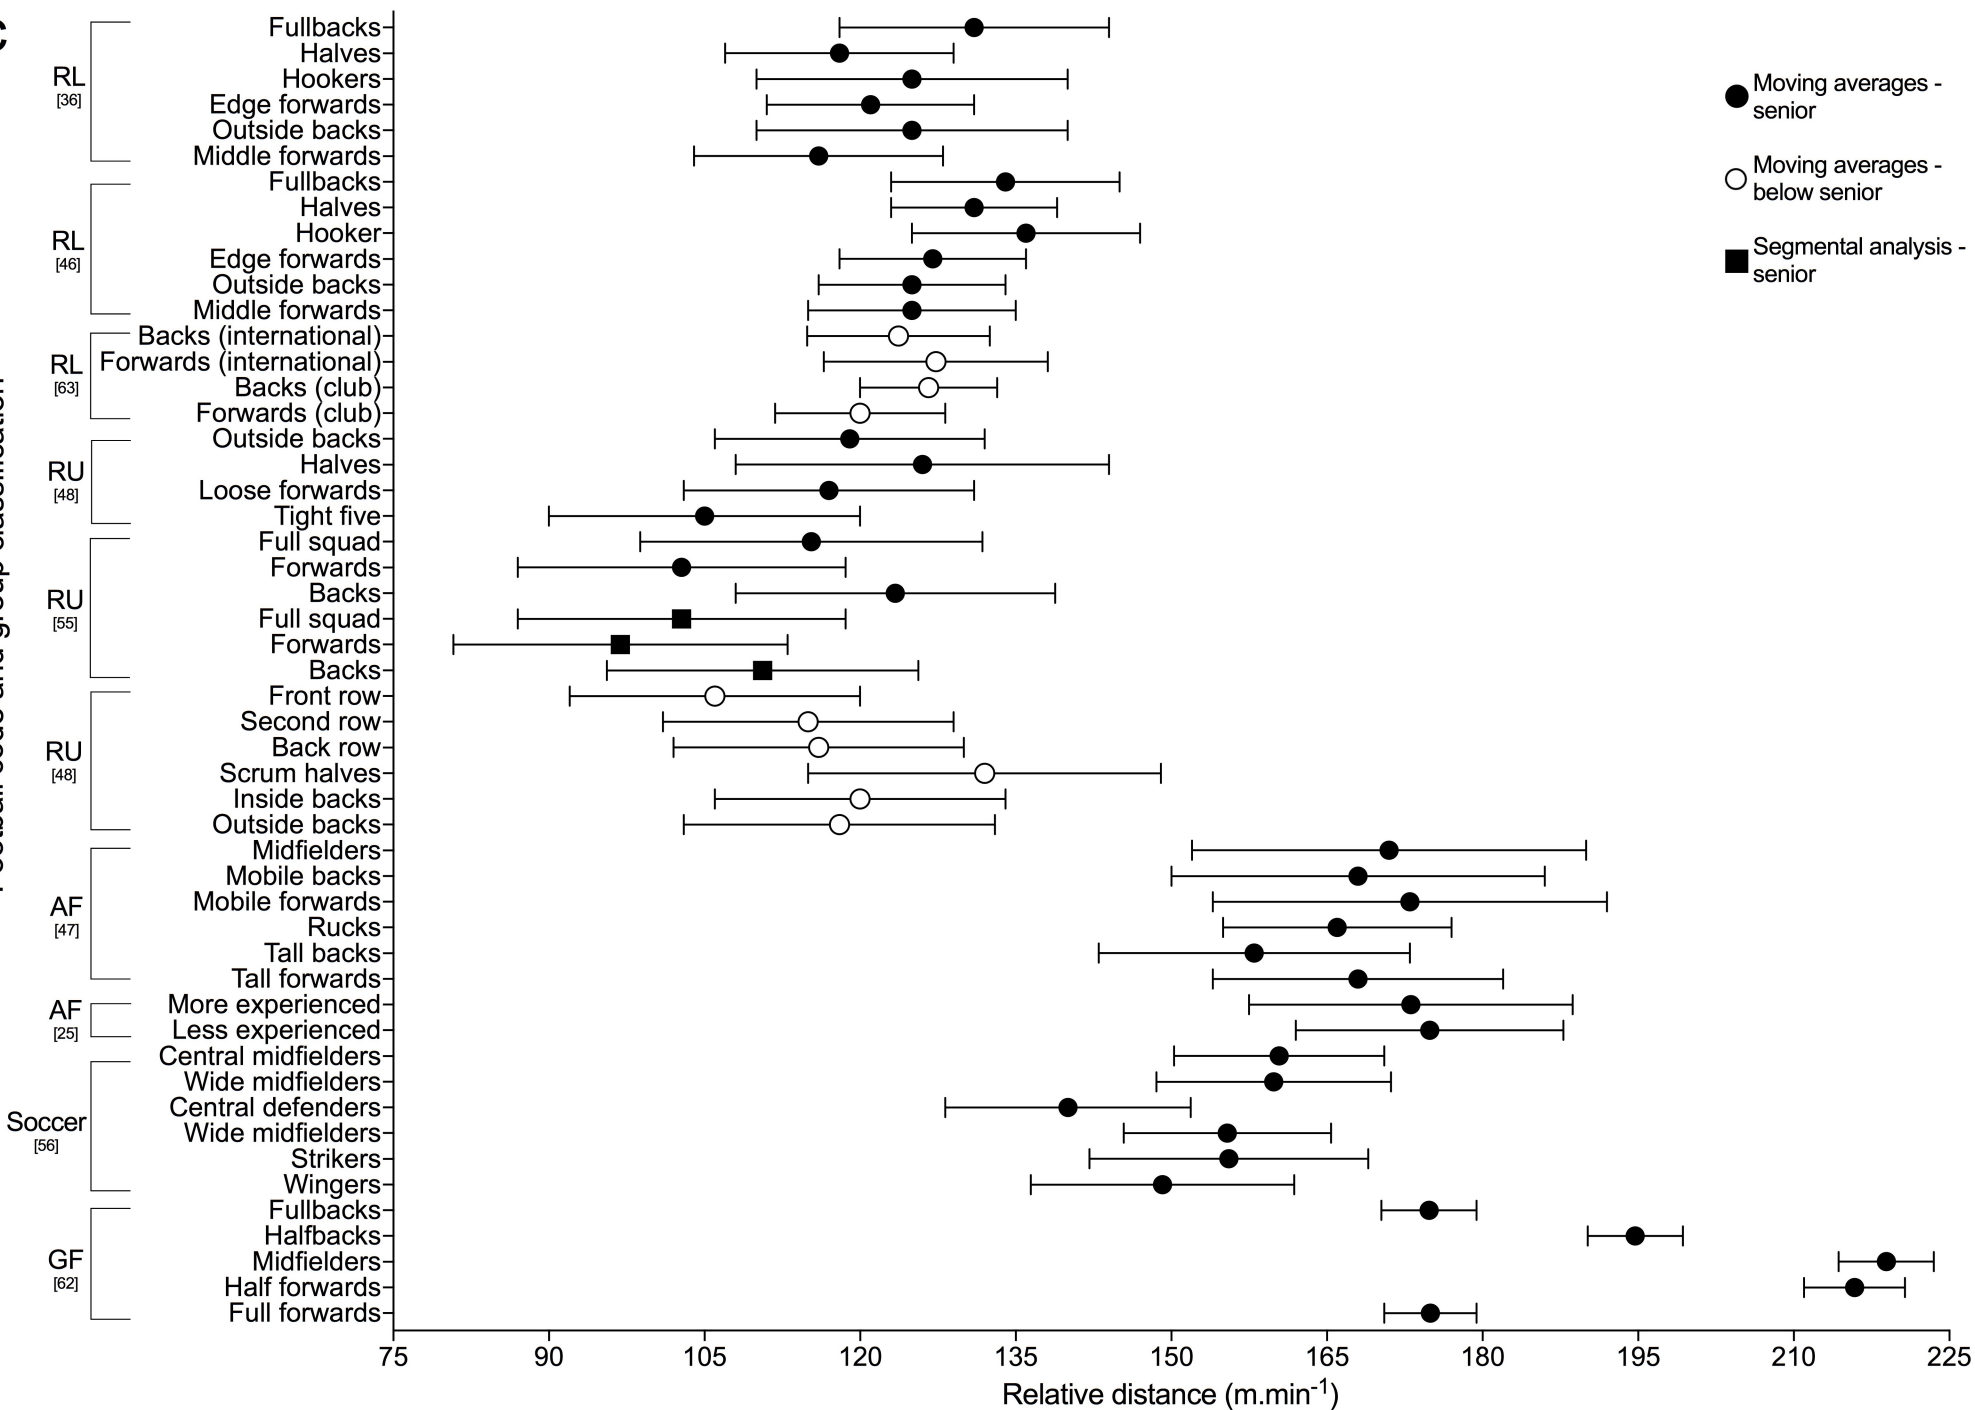

**a**

Football code and group classification

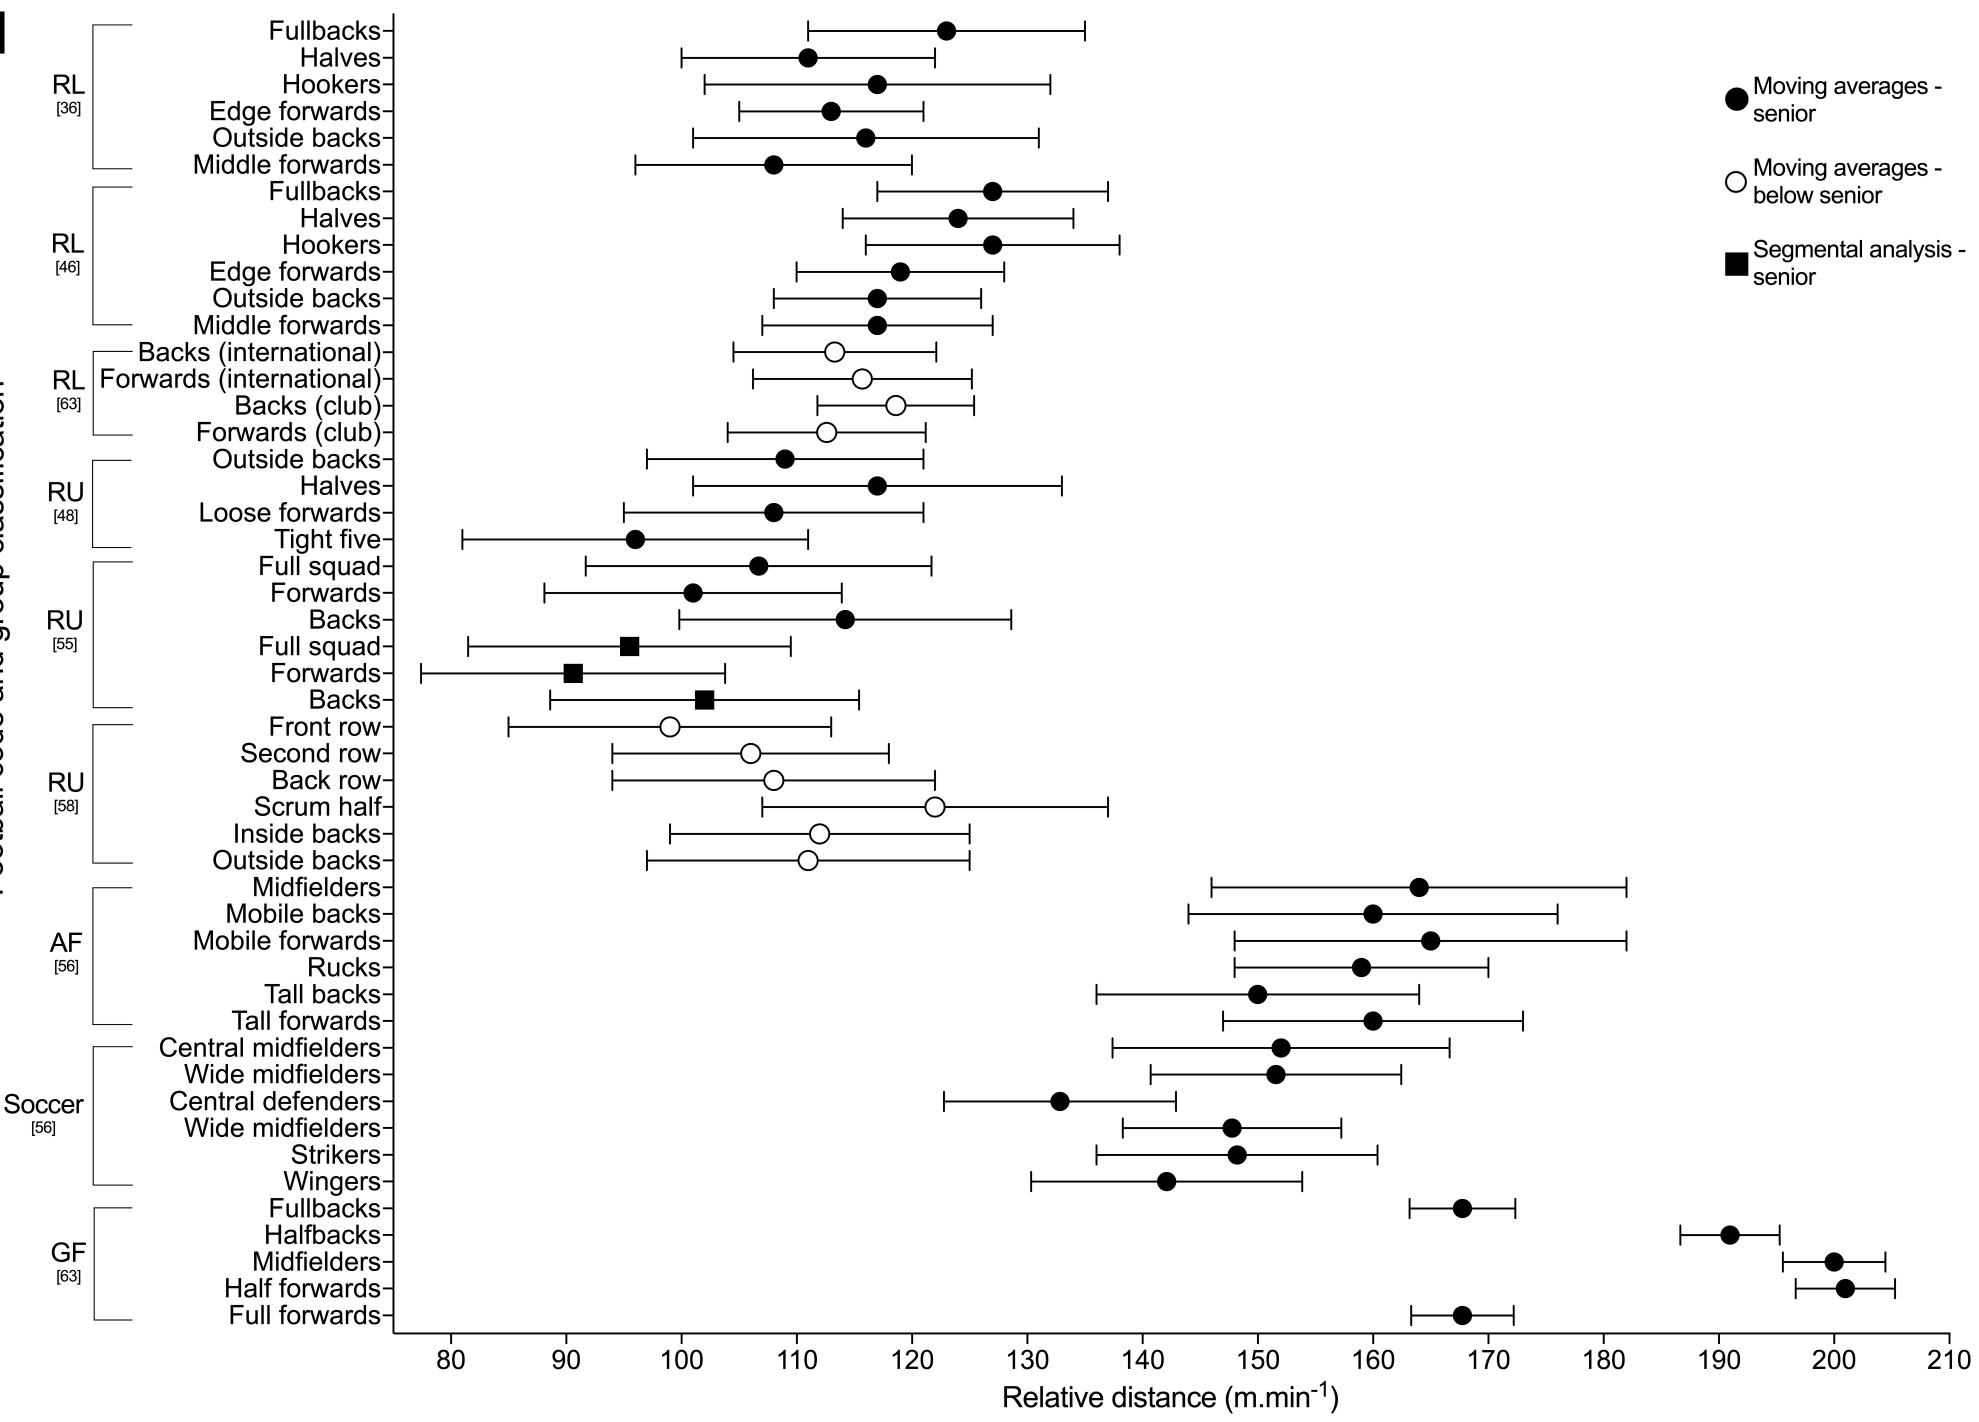Relative distance (m.min<sup>-1</sup>)

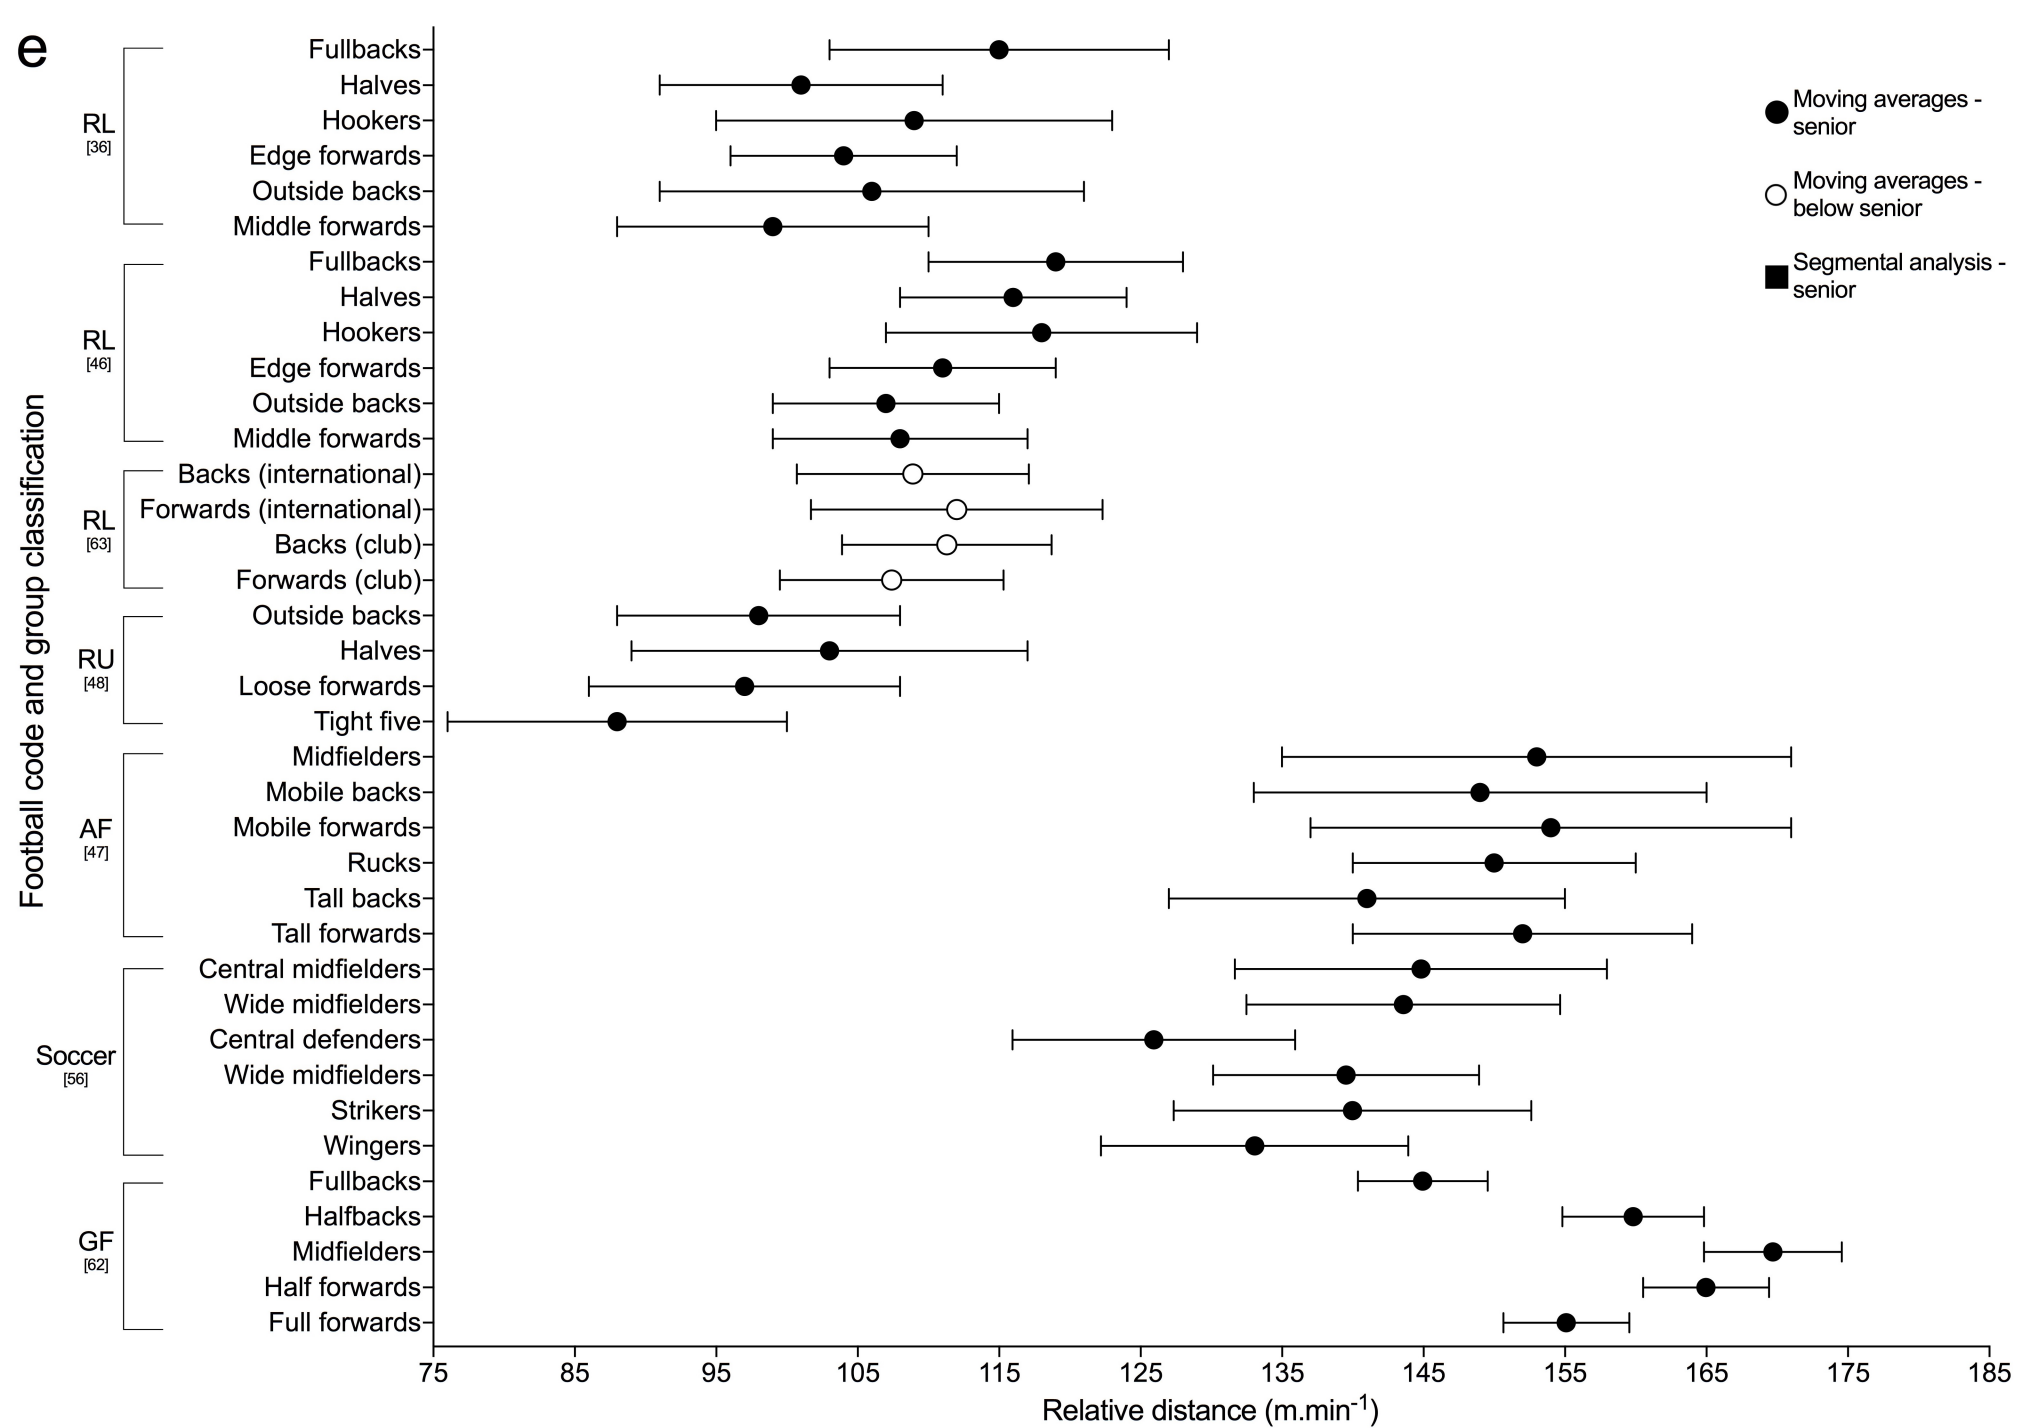

**f****Football code and group classification**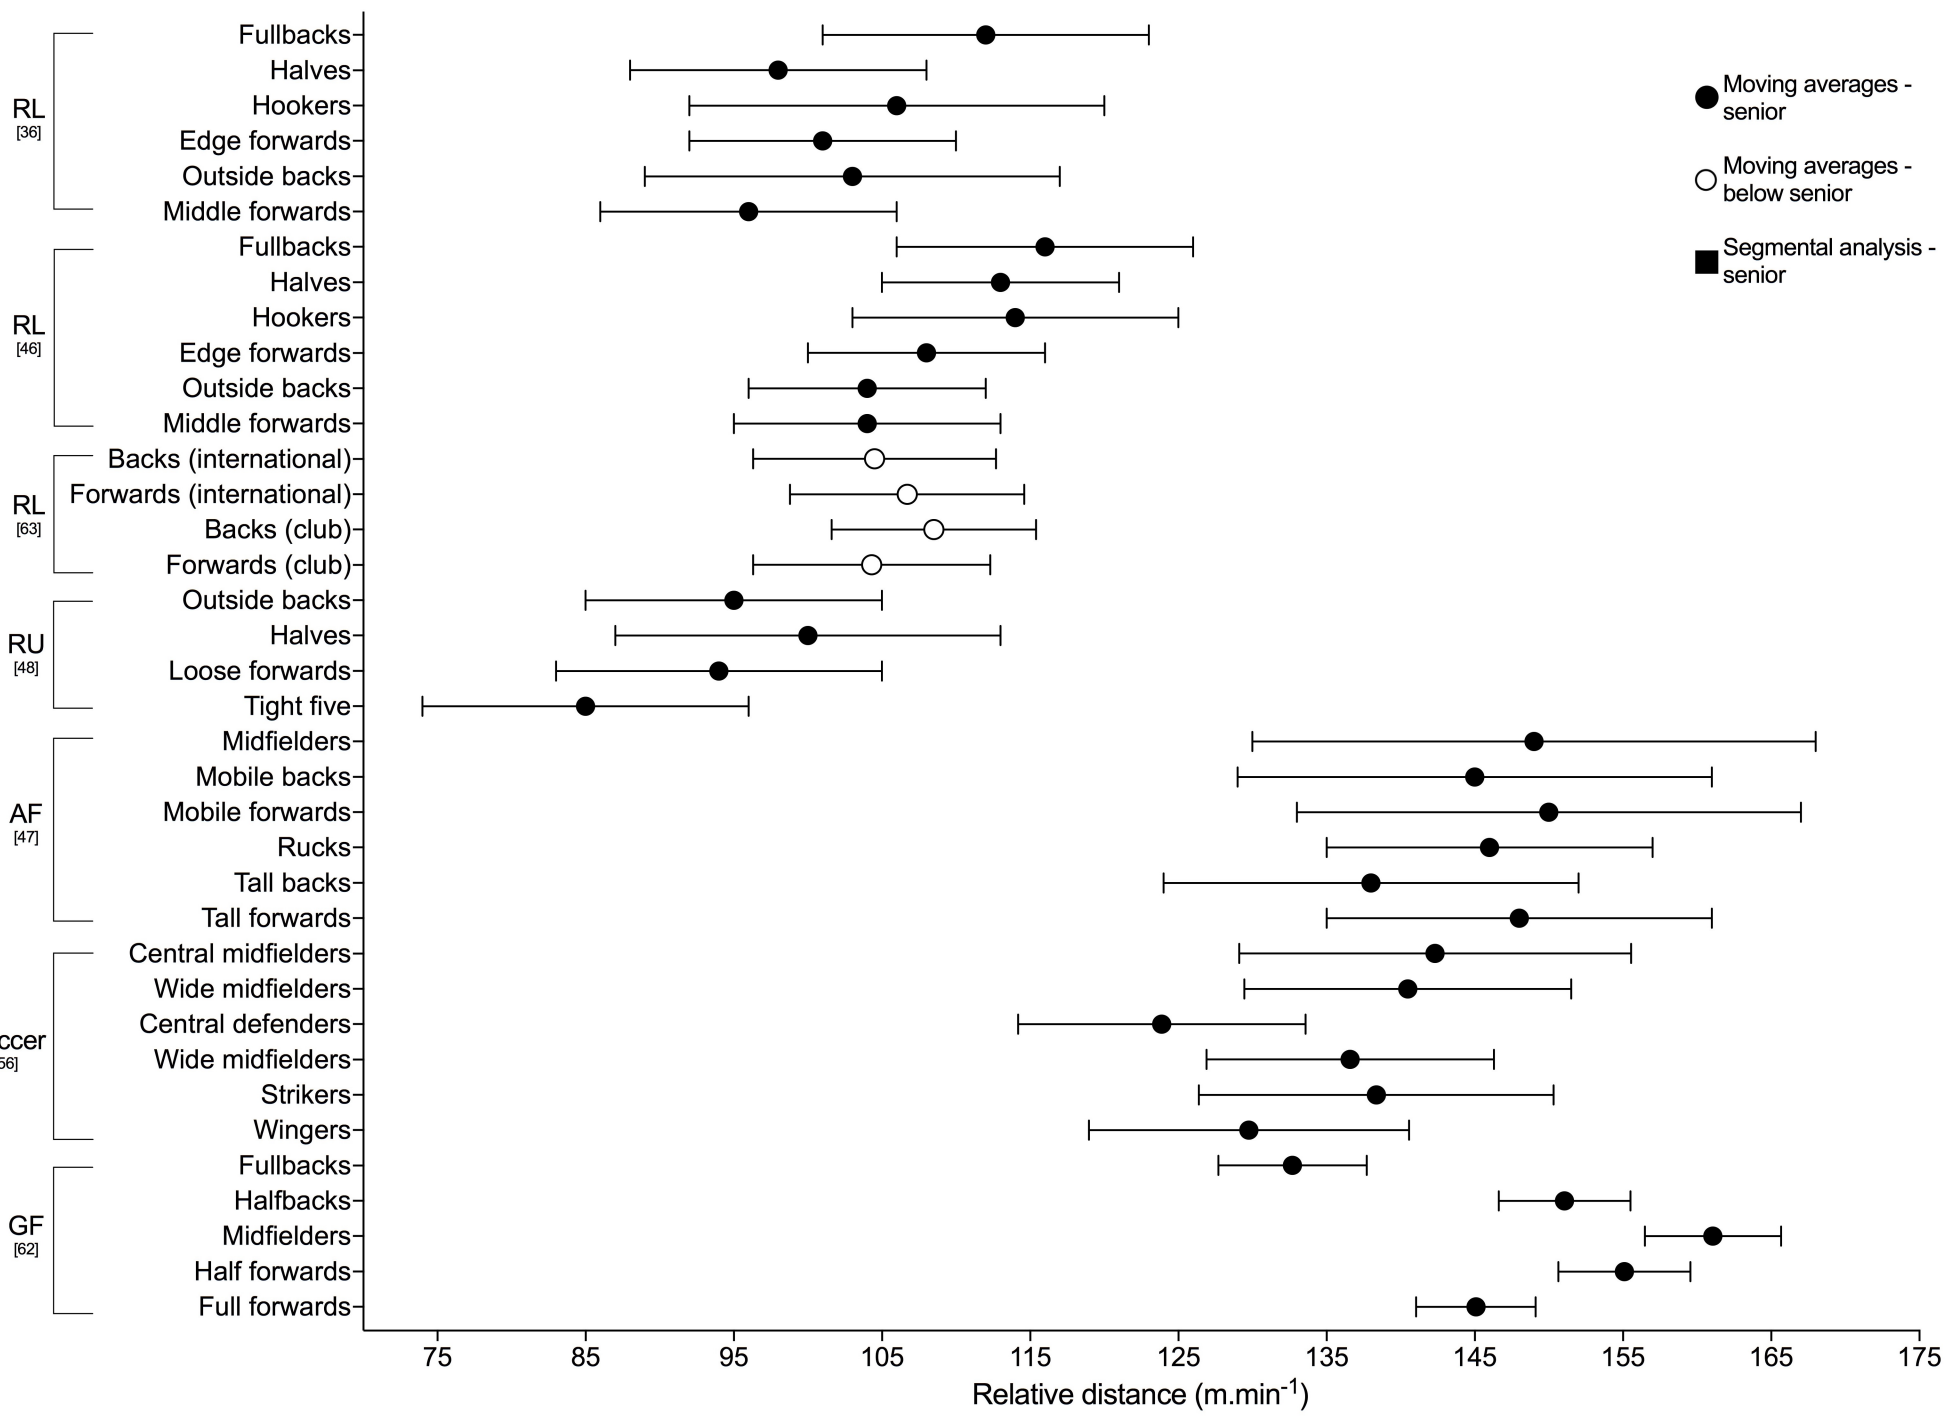

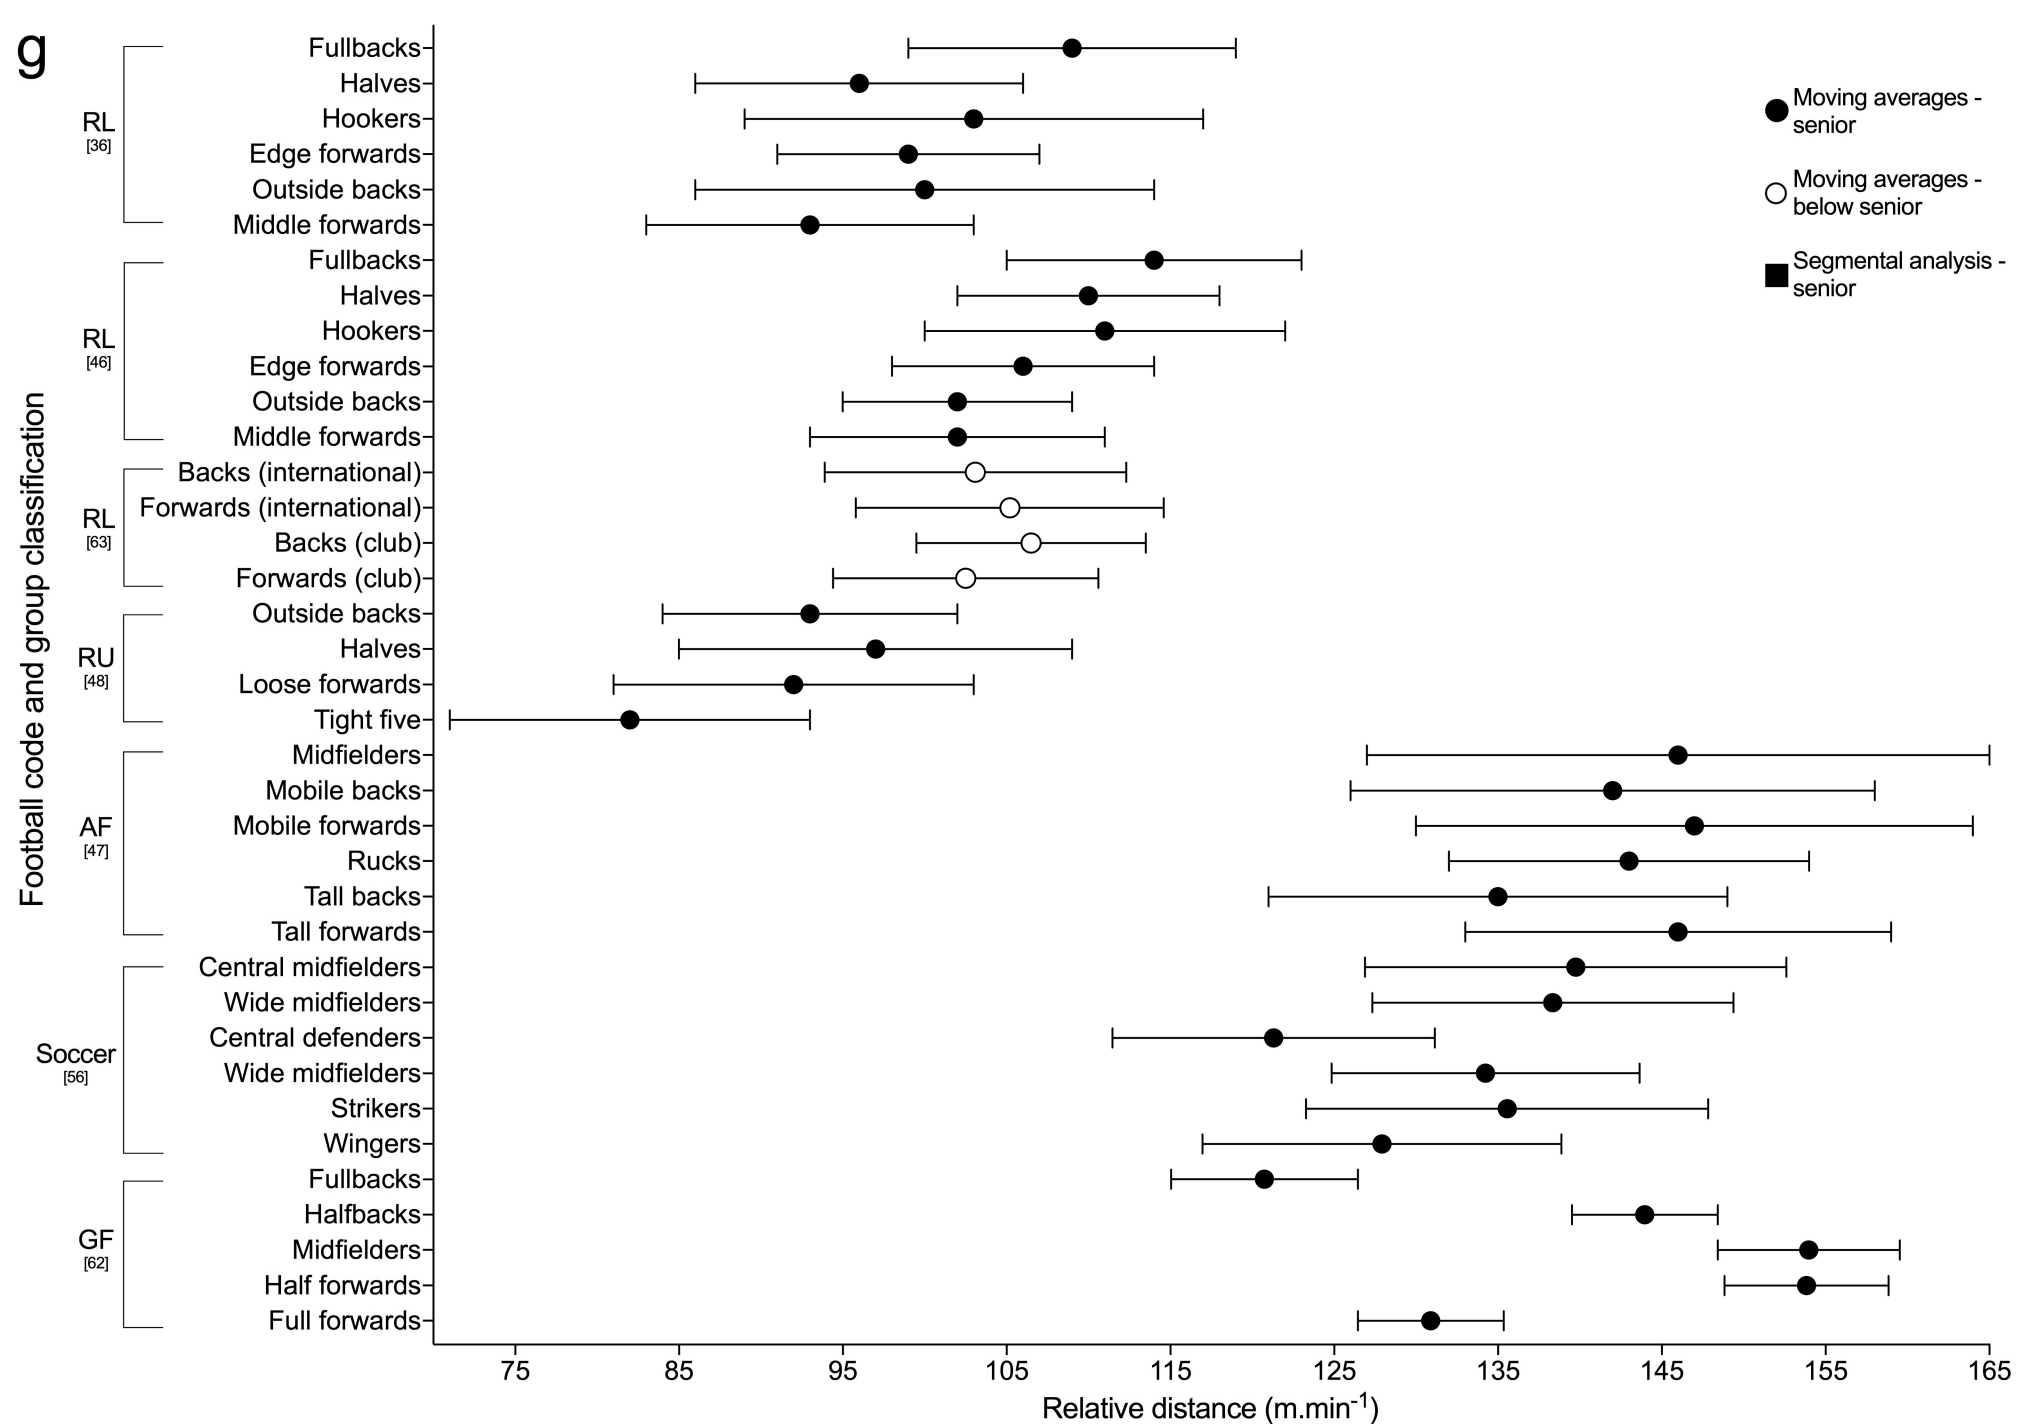

h

Football code and group classification

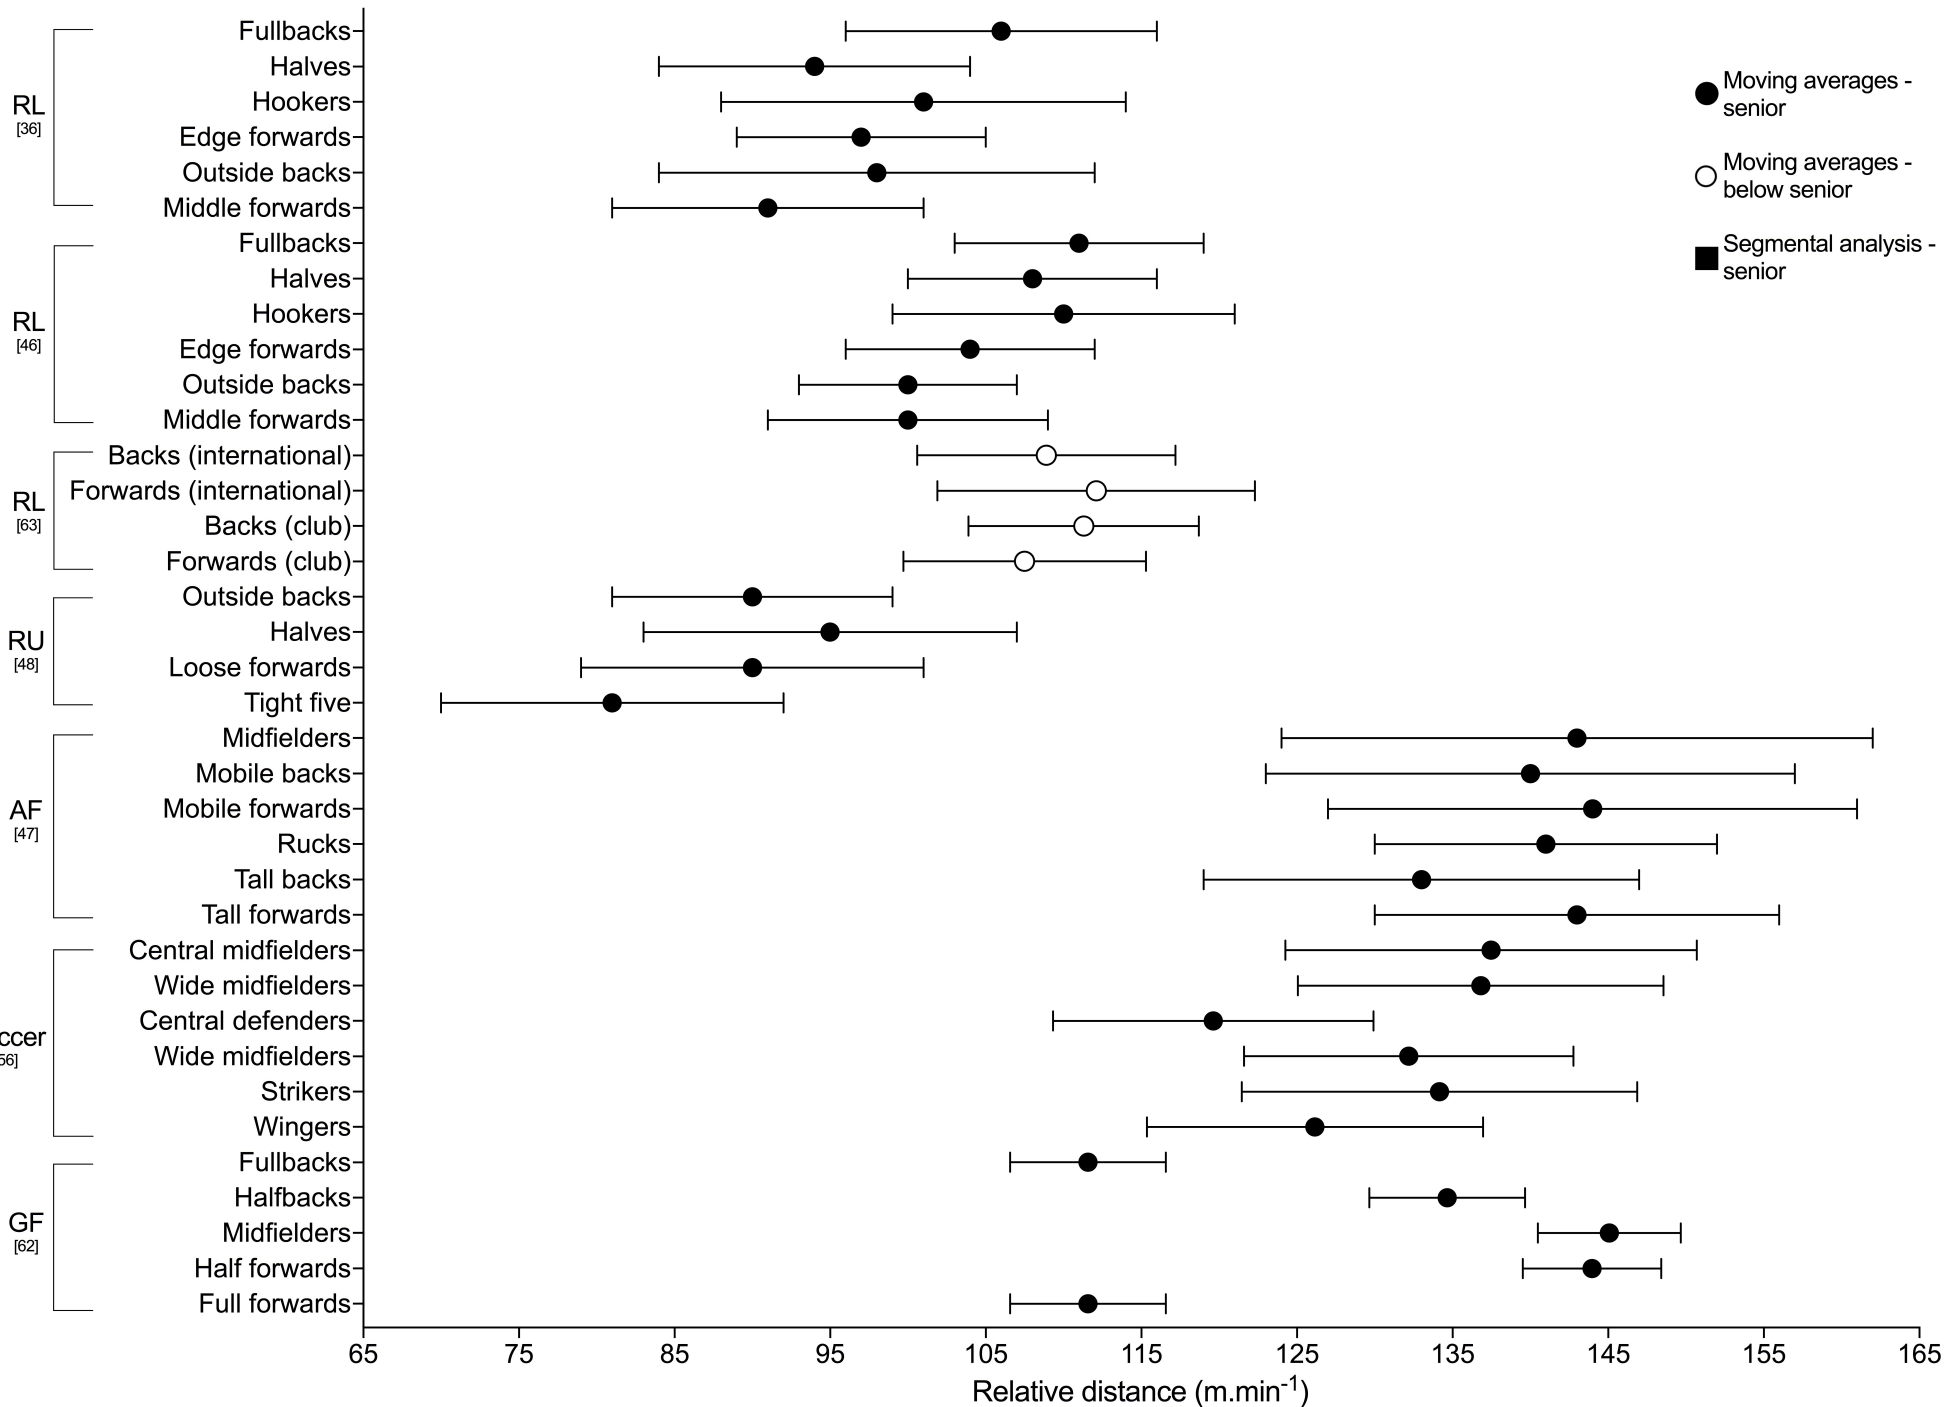

Supplement: 40279_2018_965_MOESM1_ESM.pdf [file 40279_2018_965_MOESM1_ESM.pdf]
