# Supplementary material for: The Use of Microtechnology to Quantify the Peak Match Demands of the Football Codes: A Systematic Review
Source: Sports Med. 2018 Aug 7;48(11):2549–75. doi: 10.1007/s40279-018-0965-6 (PMC6182461; doi:10.1007/s40279-018-0965-6)

**a**

Football code and group classification

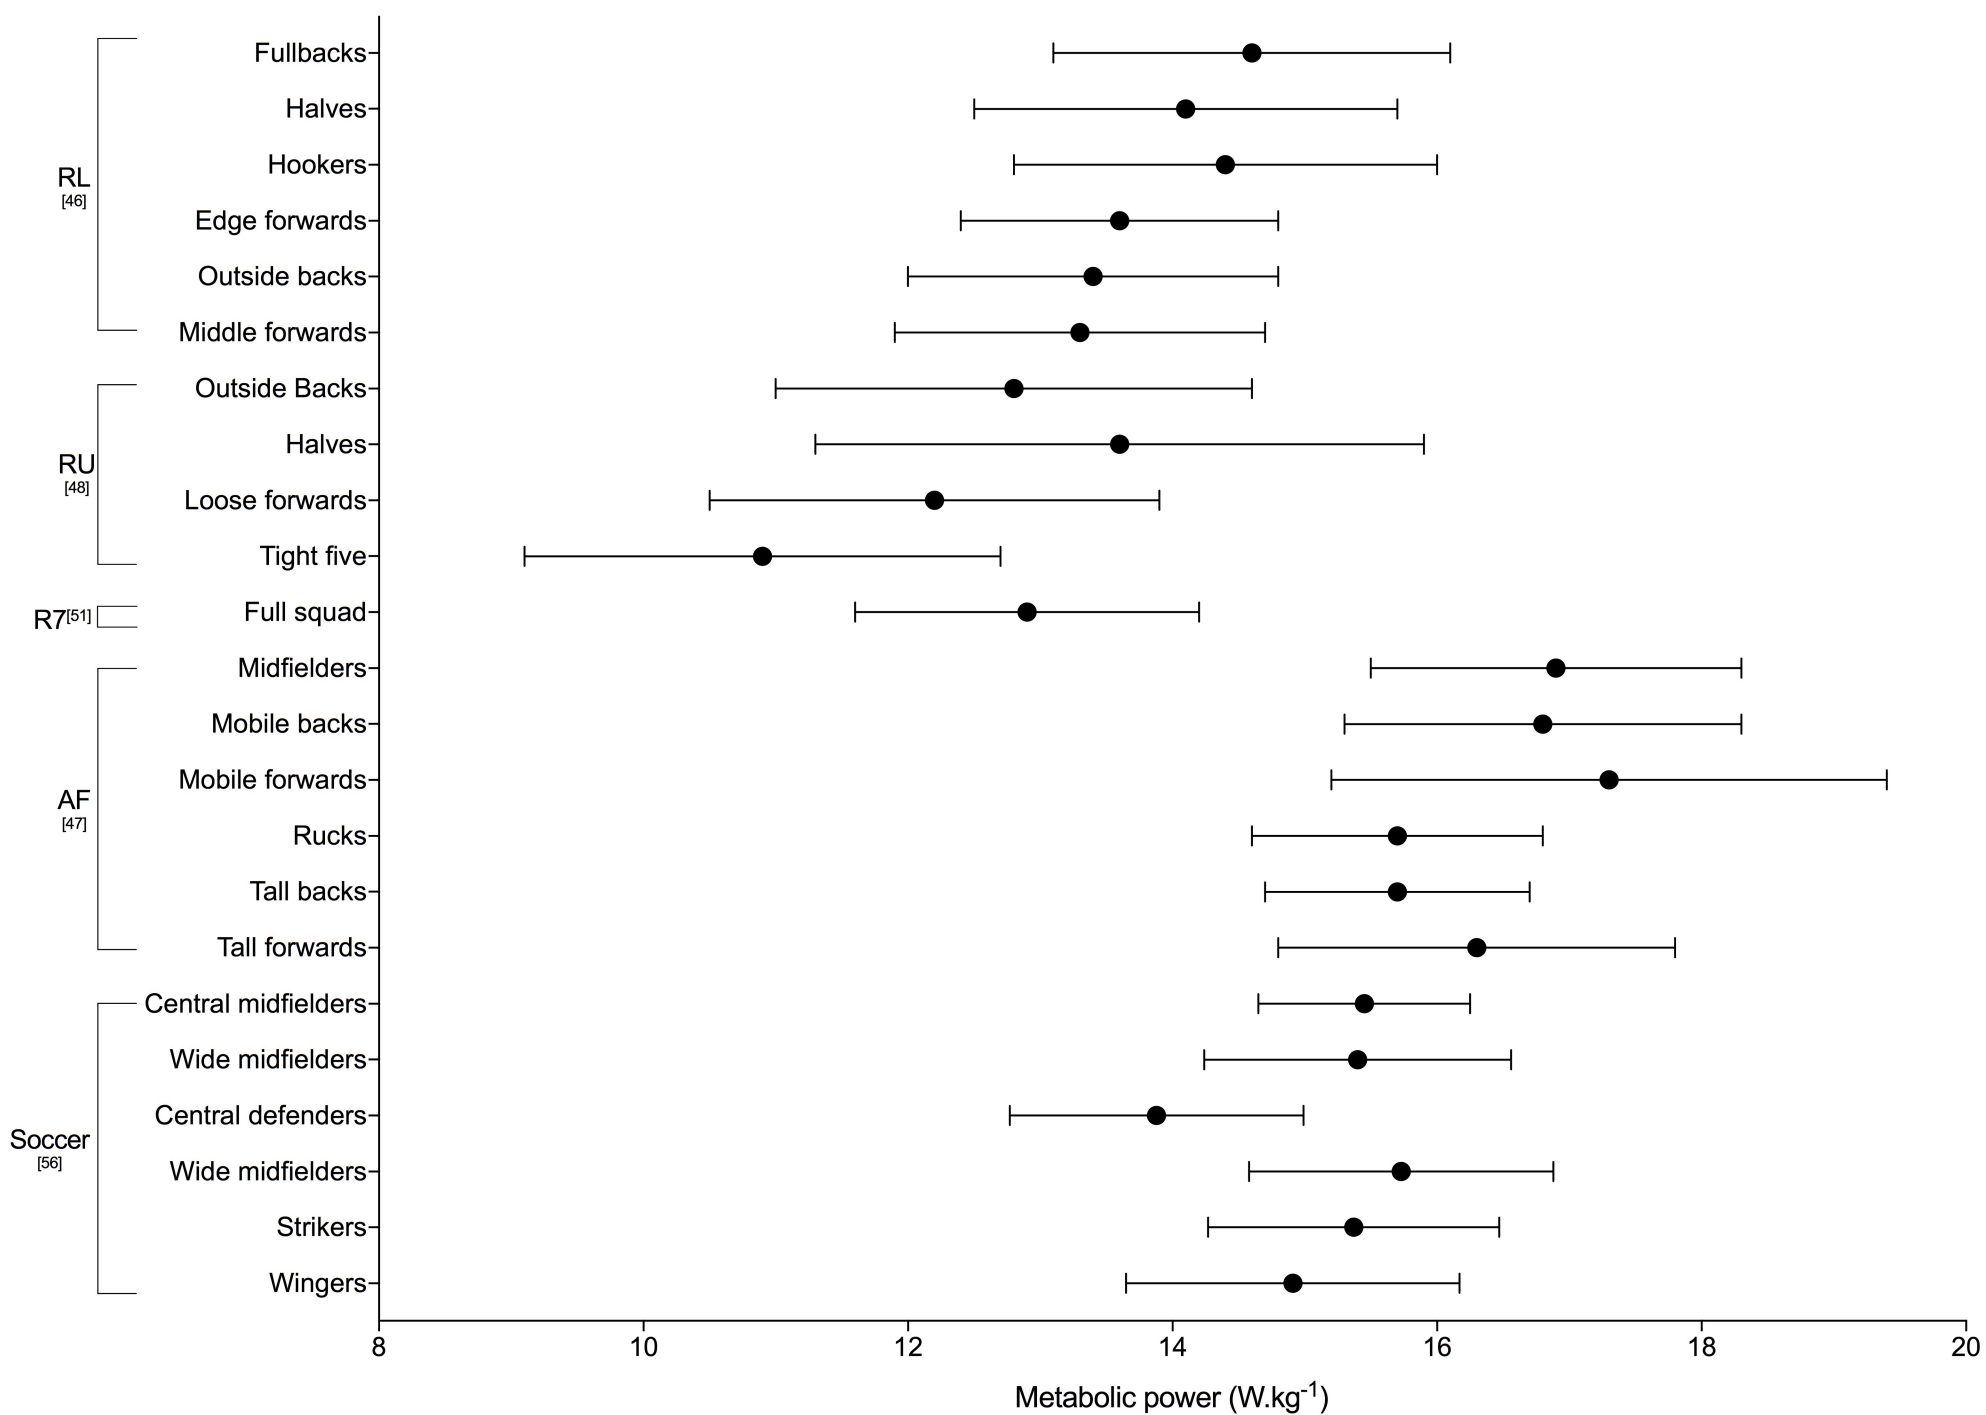

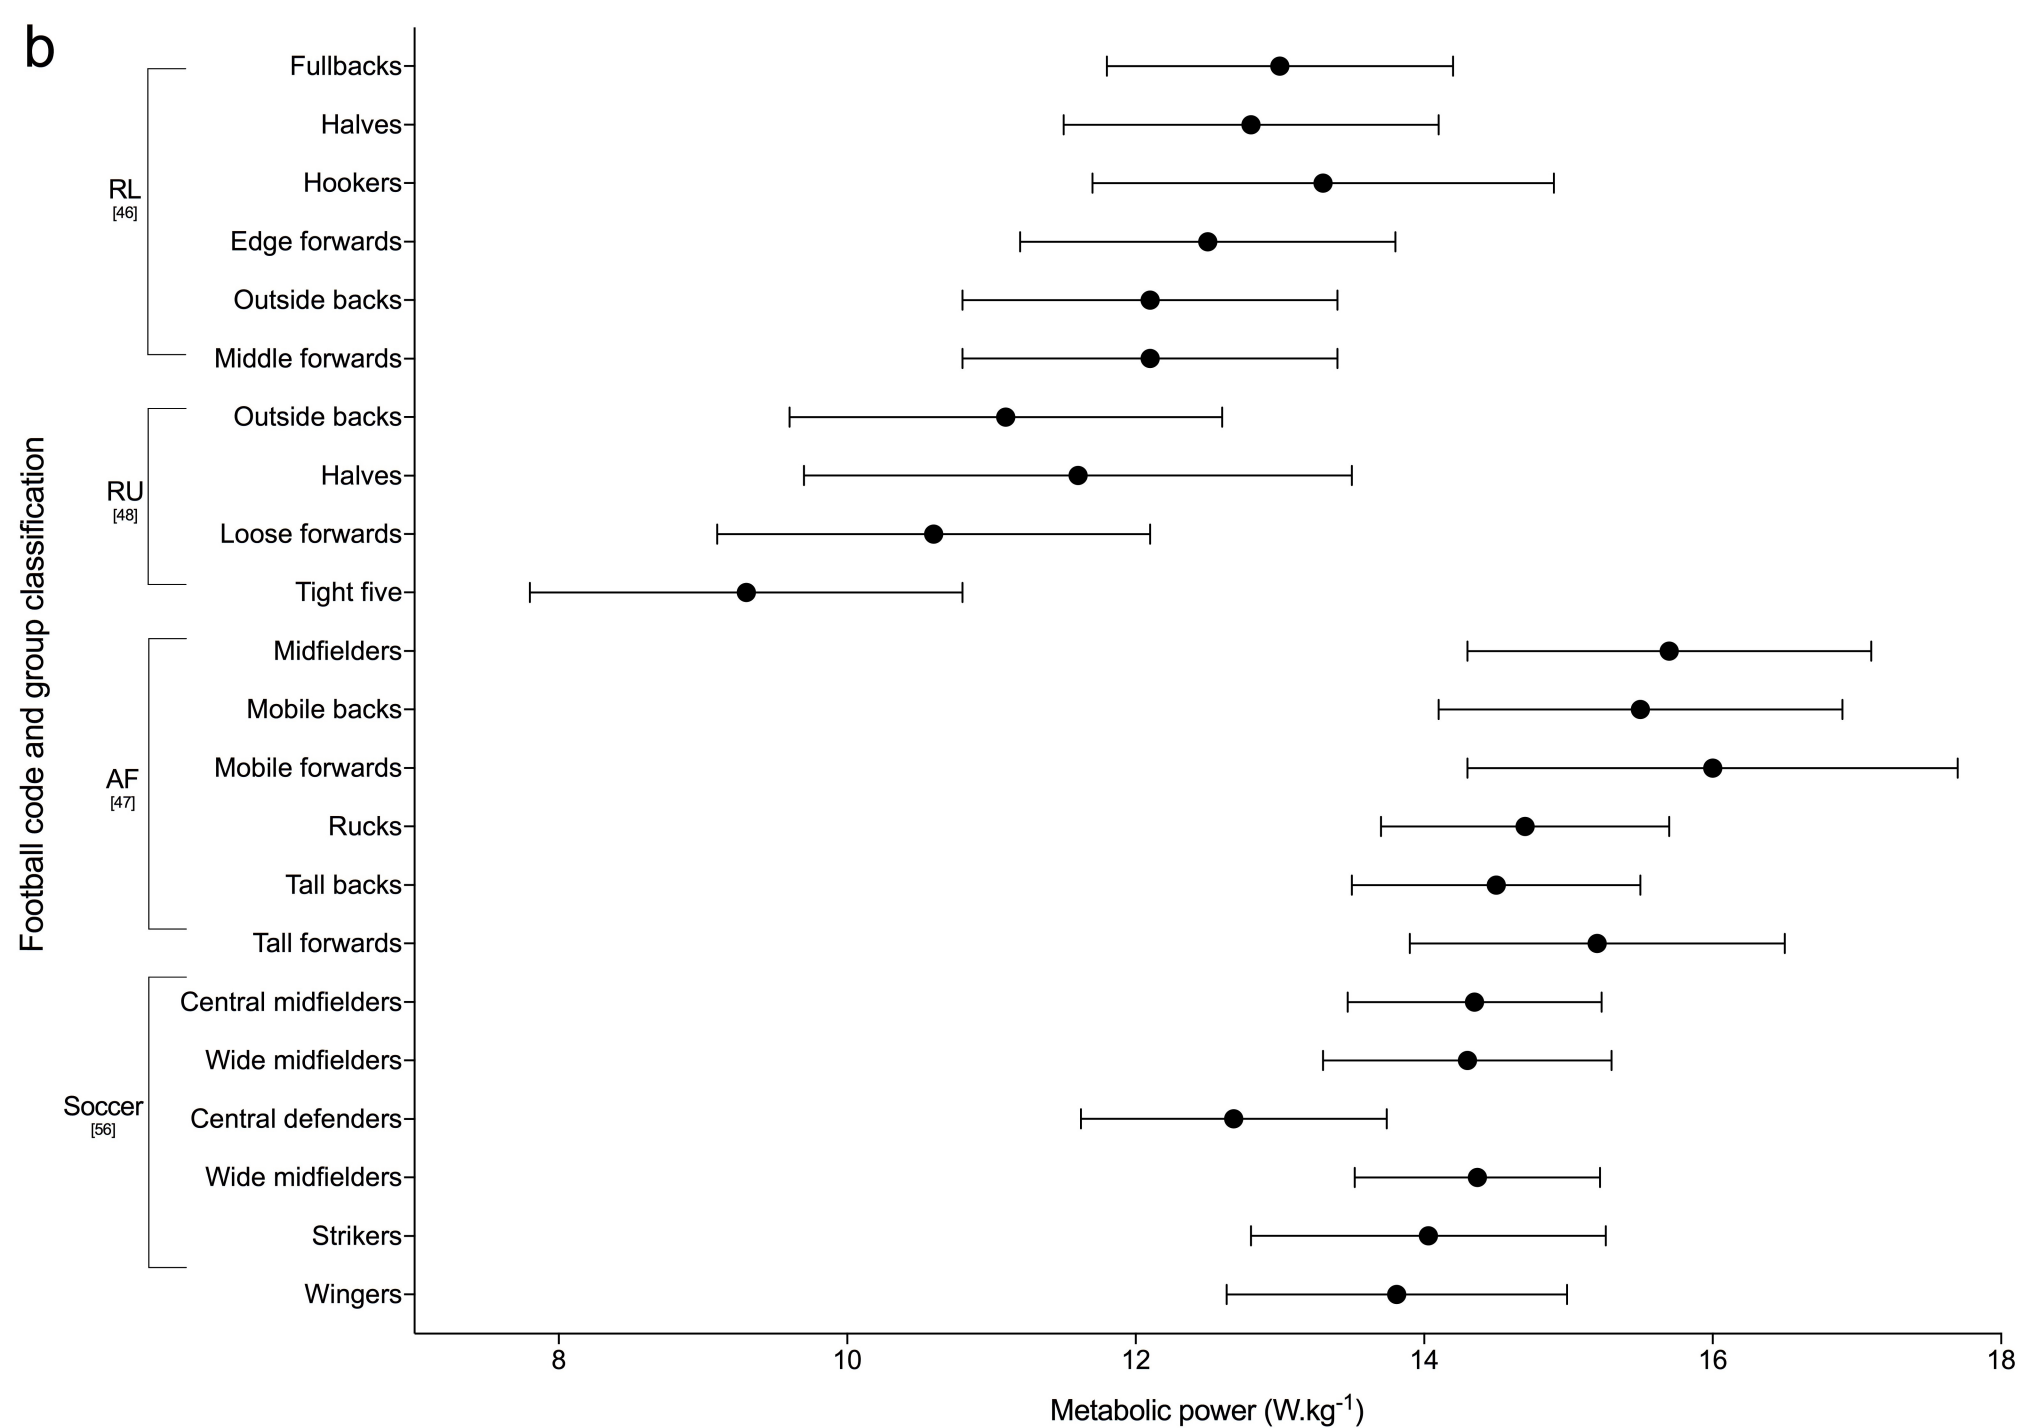

C

Football code and group classification

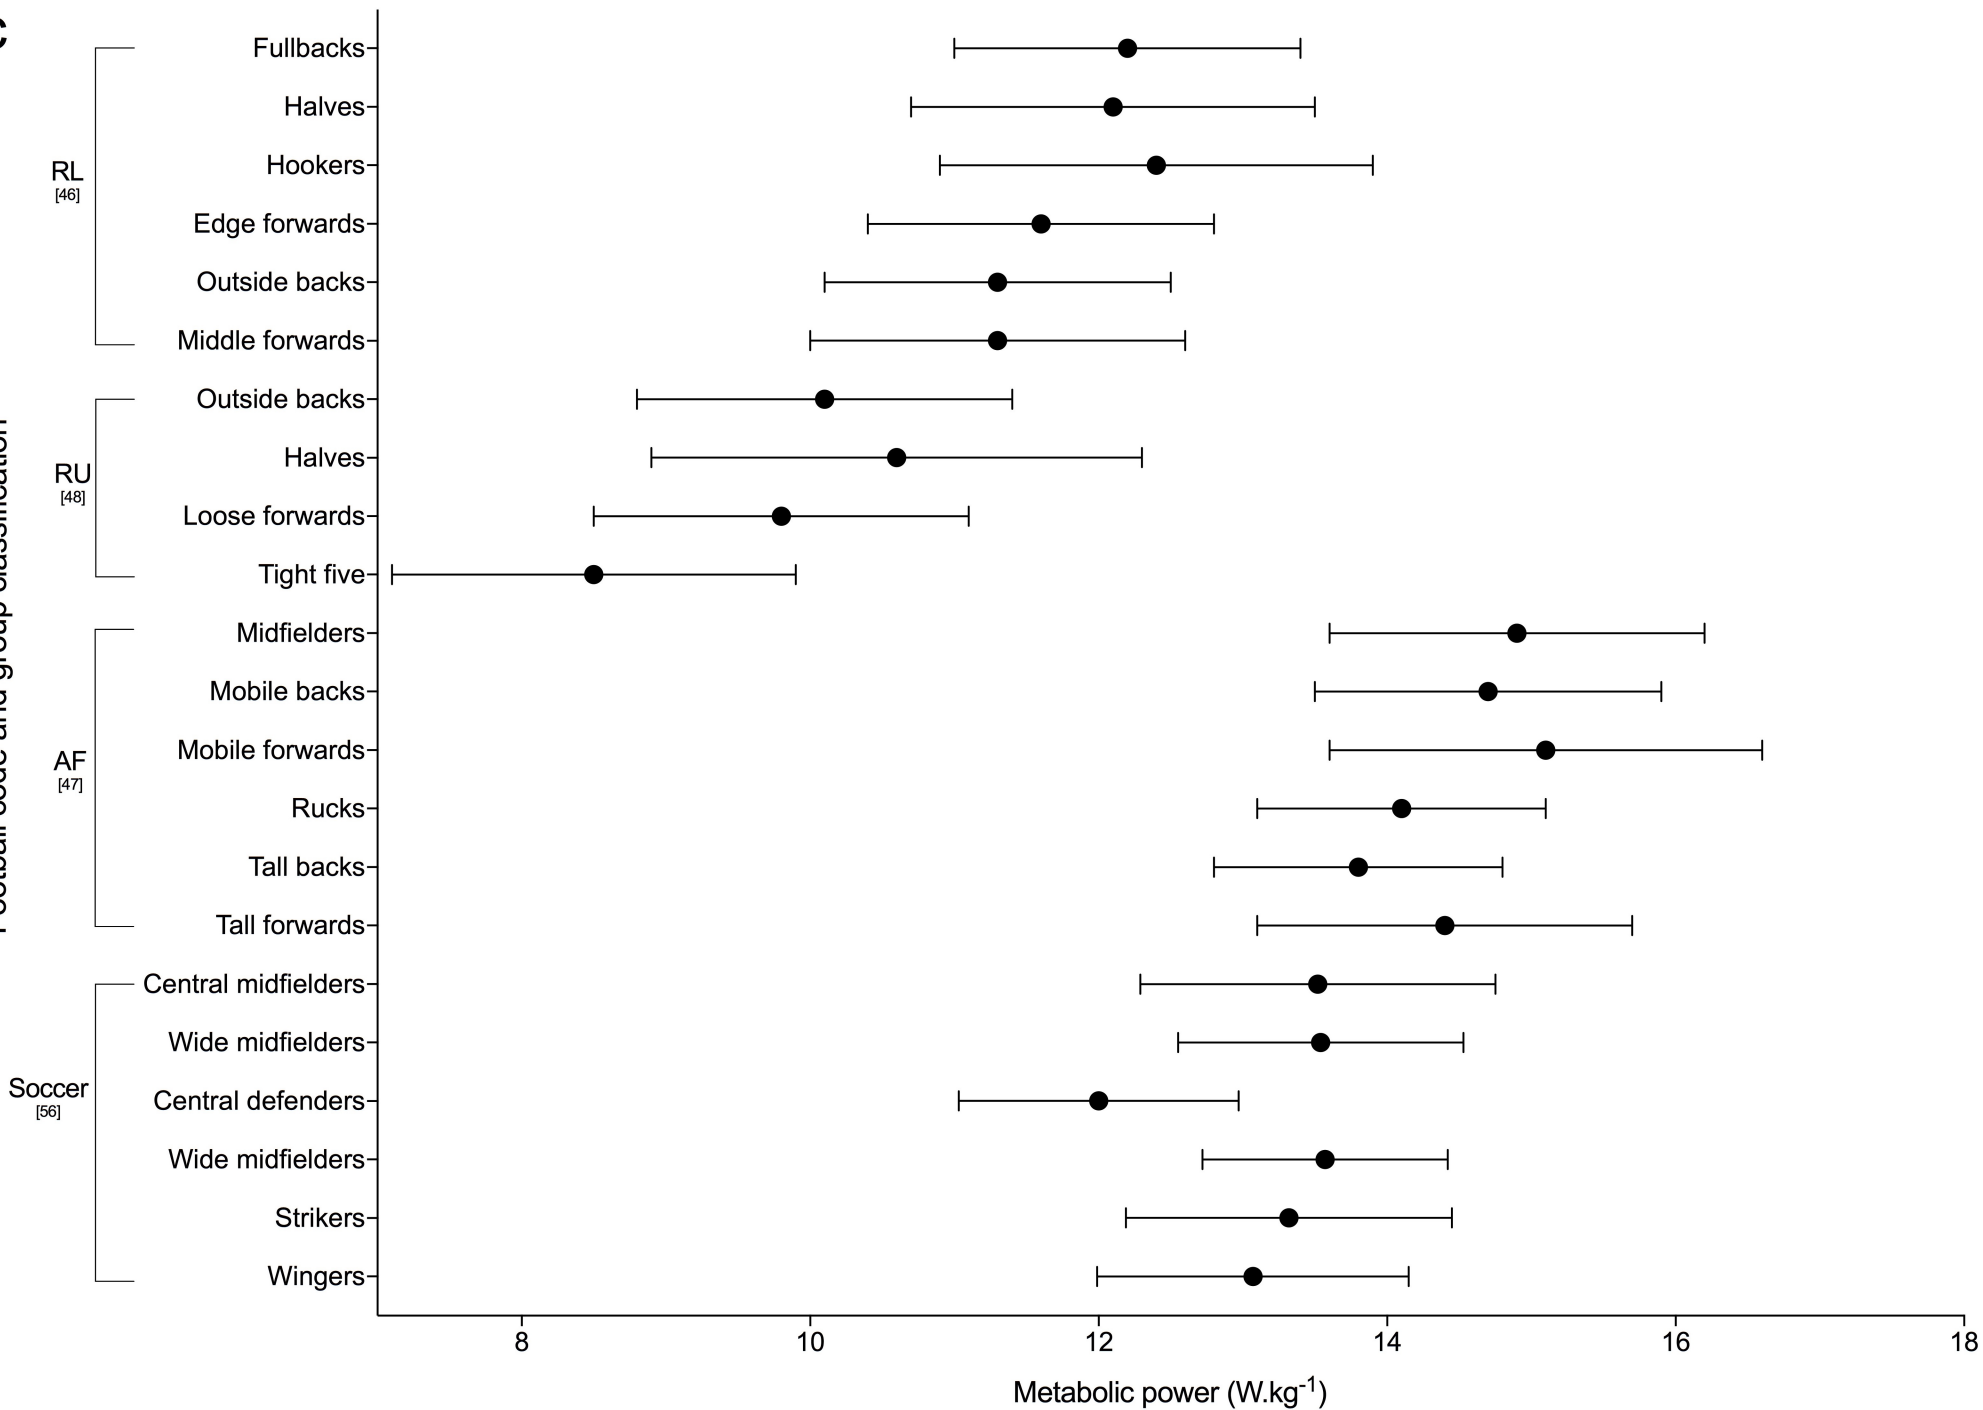

d

Football code and group classification

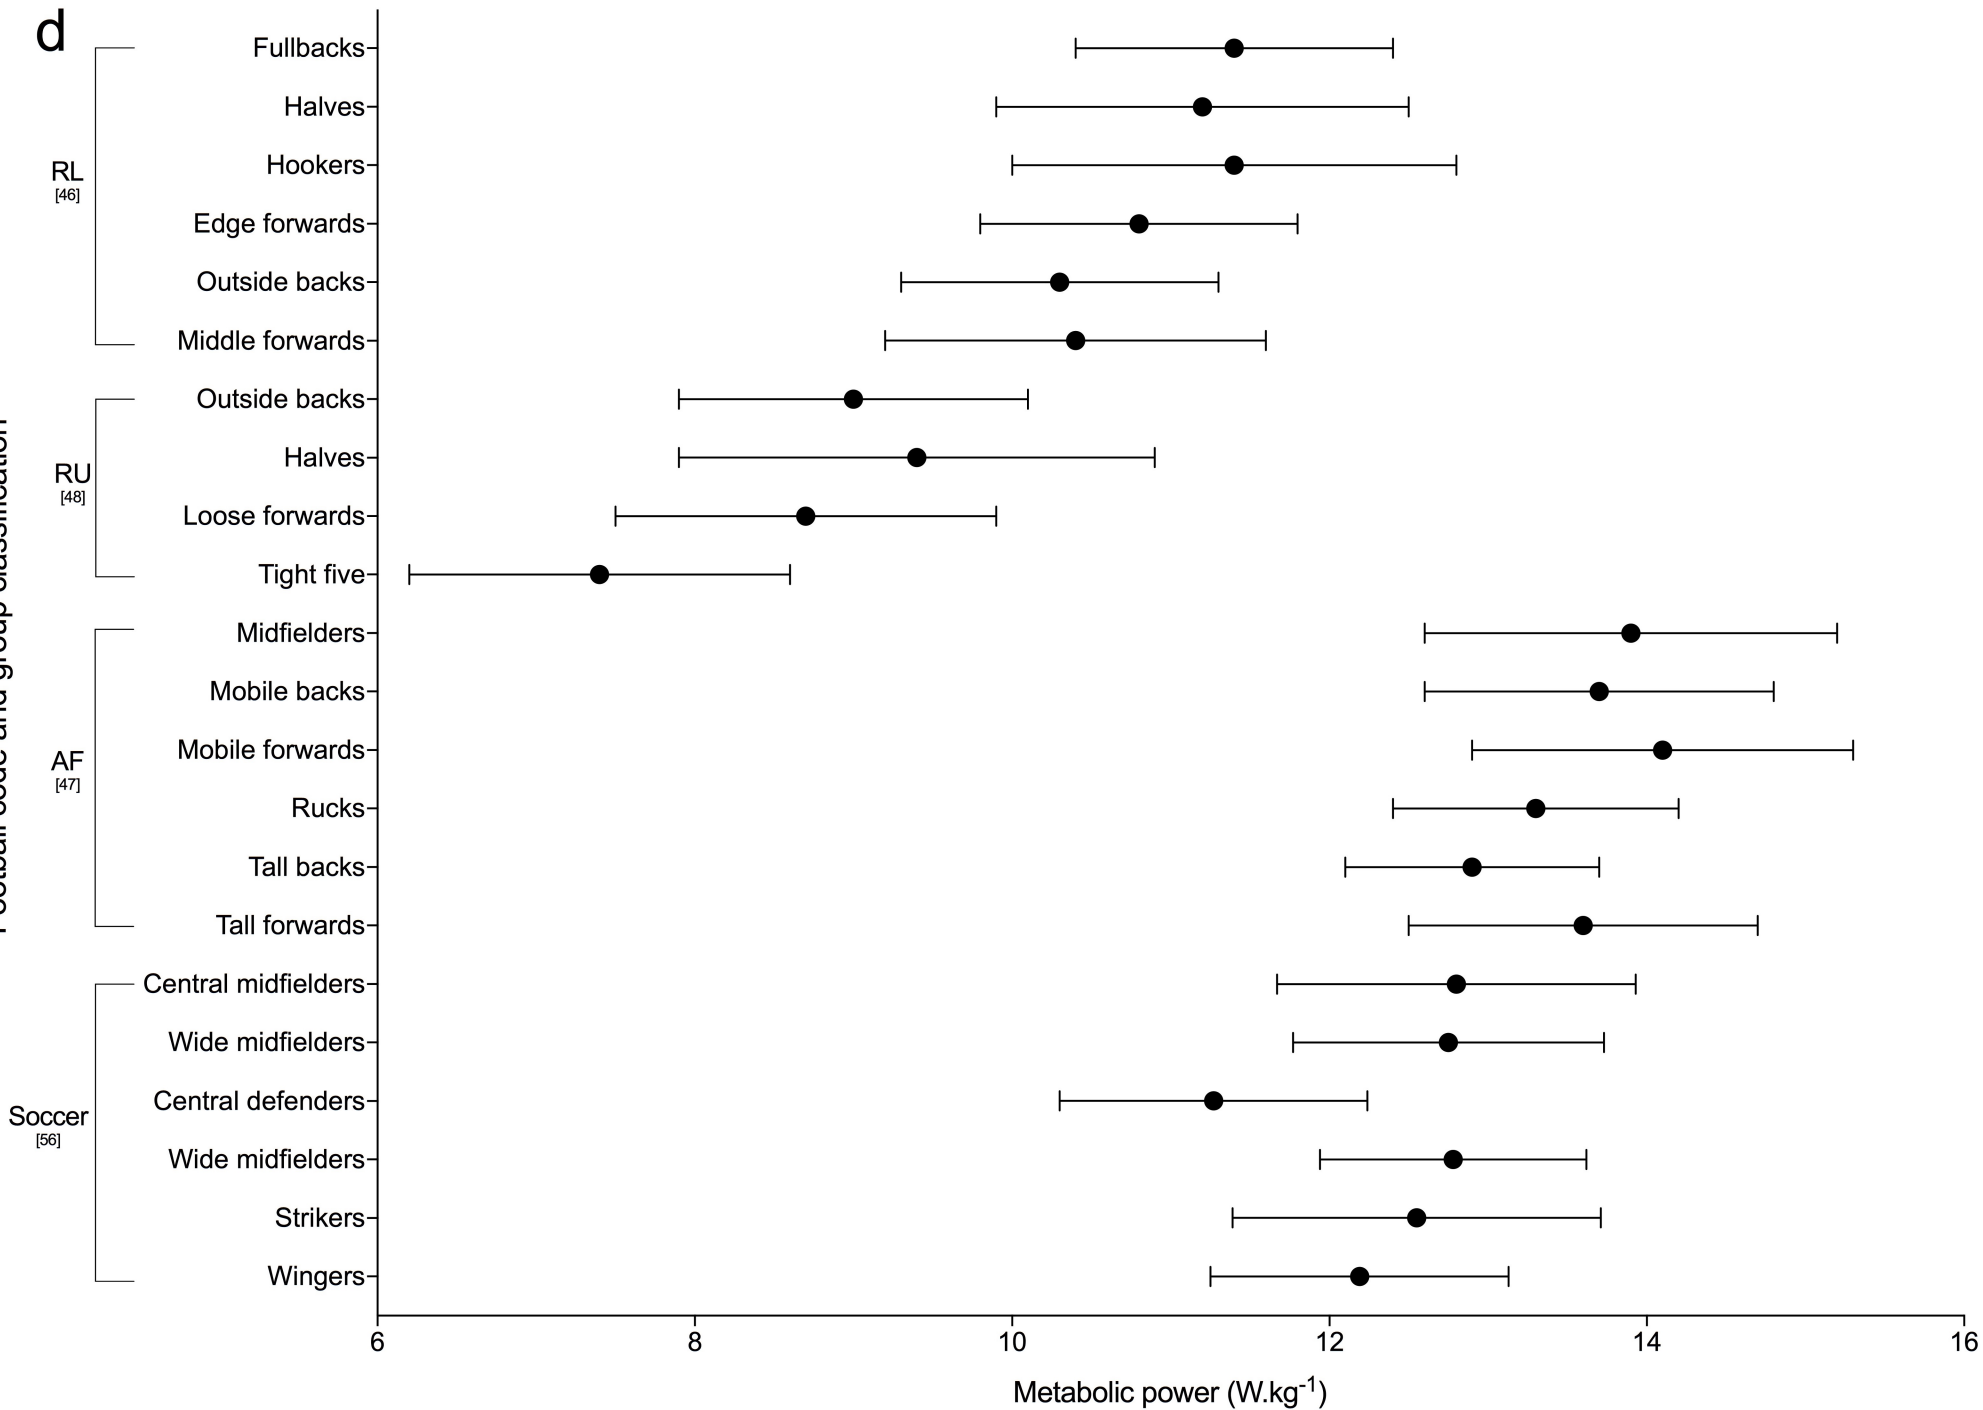

②

Football code and group classification

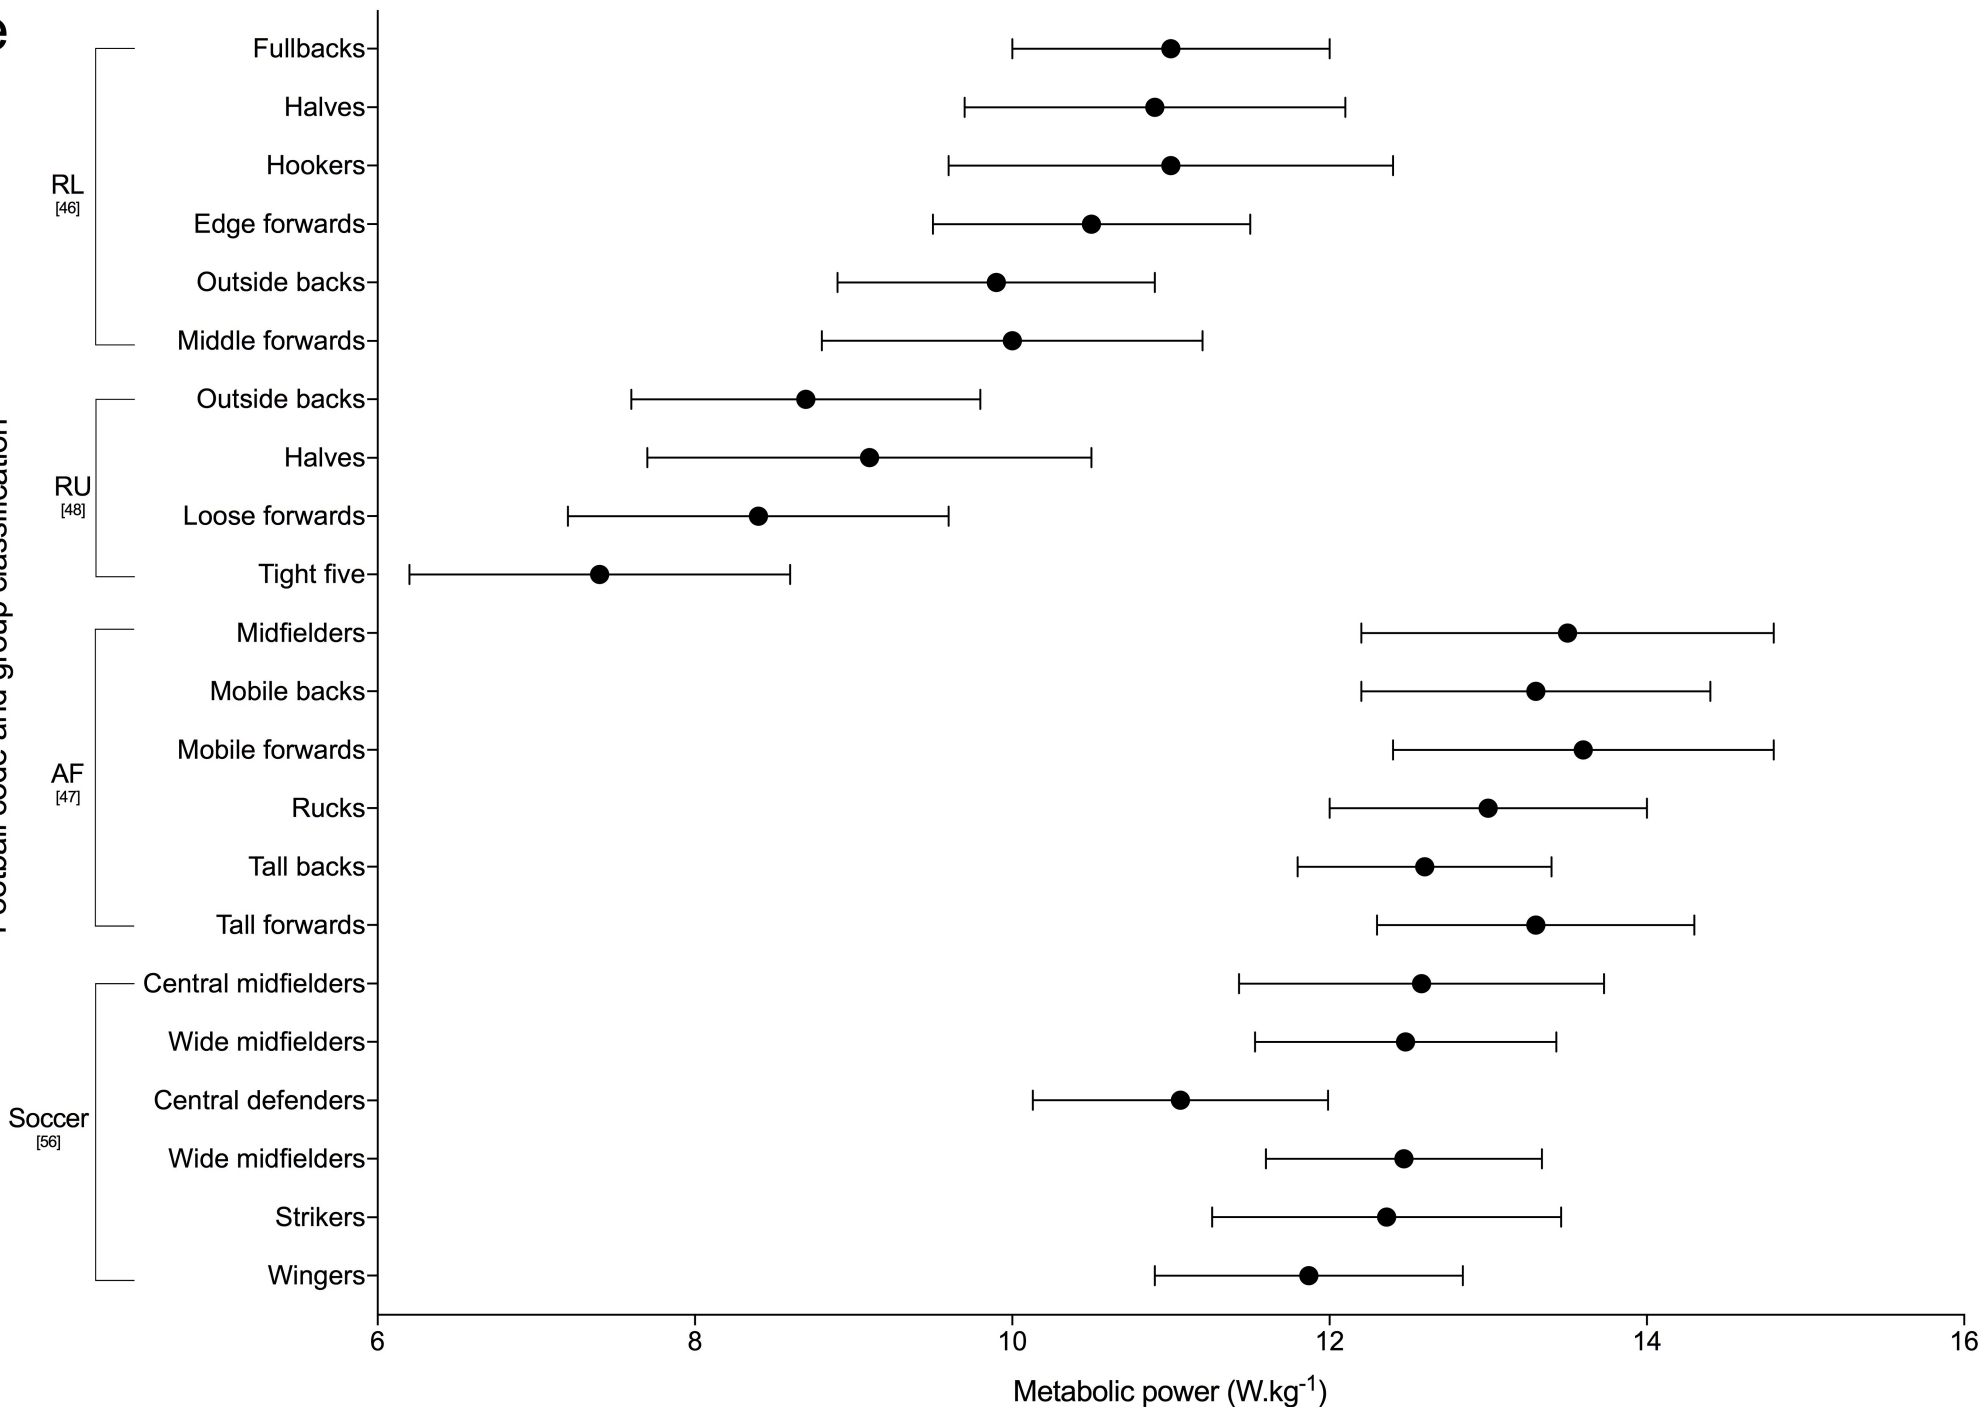

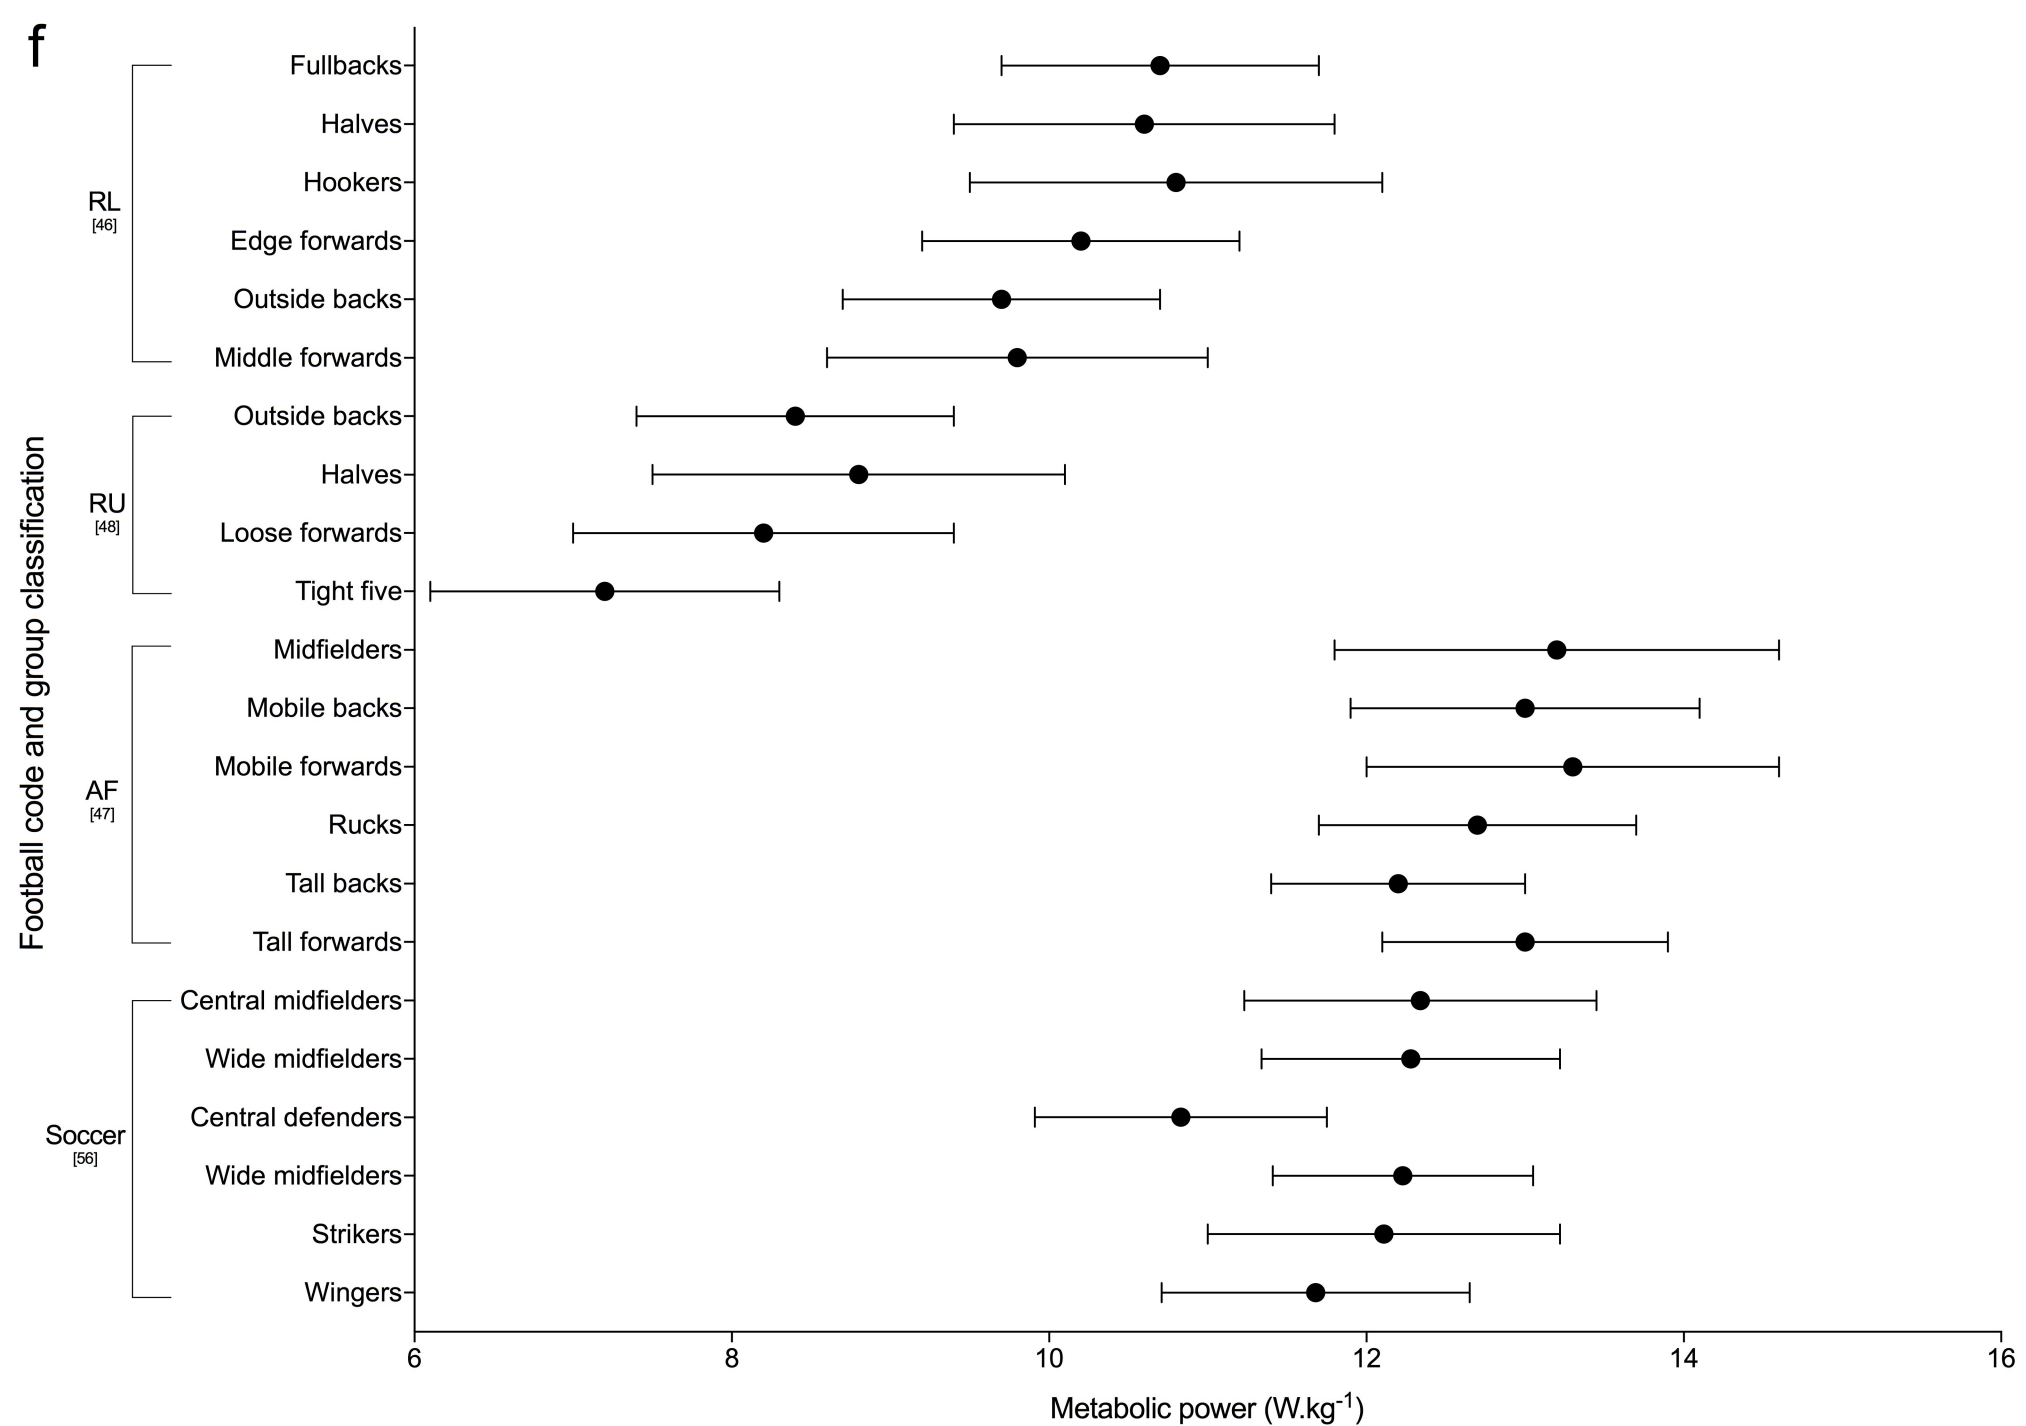

g

RL  
[46]RU  
[48]AF  
[47]Soccer  
[56]

Fullbacks

Halves

Hookers

Edge forwards

Outside backs

Middle forwards

Outside backs

Halves

Loose forwards

Tight five

Midfielders

Mobile backs

Mobile forwards

Rucks

Tall backs

Tall forwards

Central midfielders

Wide midfielders

Central defenders

Wide midfielders

Strikers

Wingers

6

8

10

12

14

16

Metabolic power ( $\text{W}\cdot\text{kg}^{-1}$ )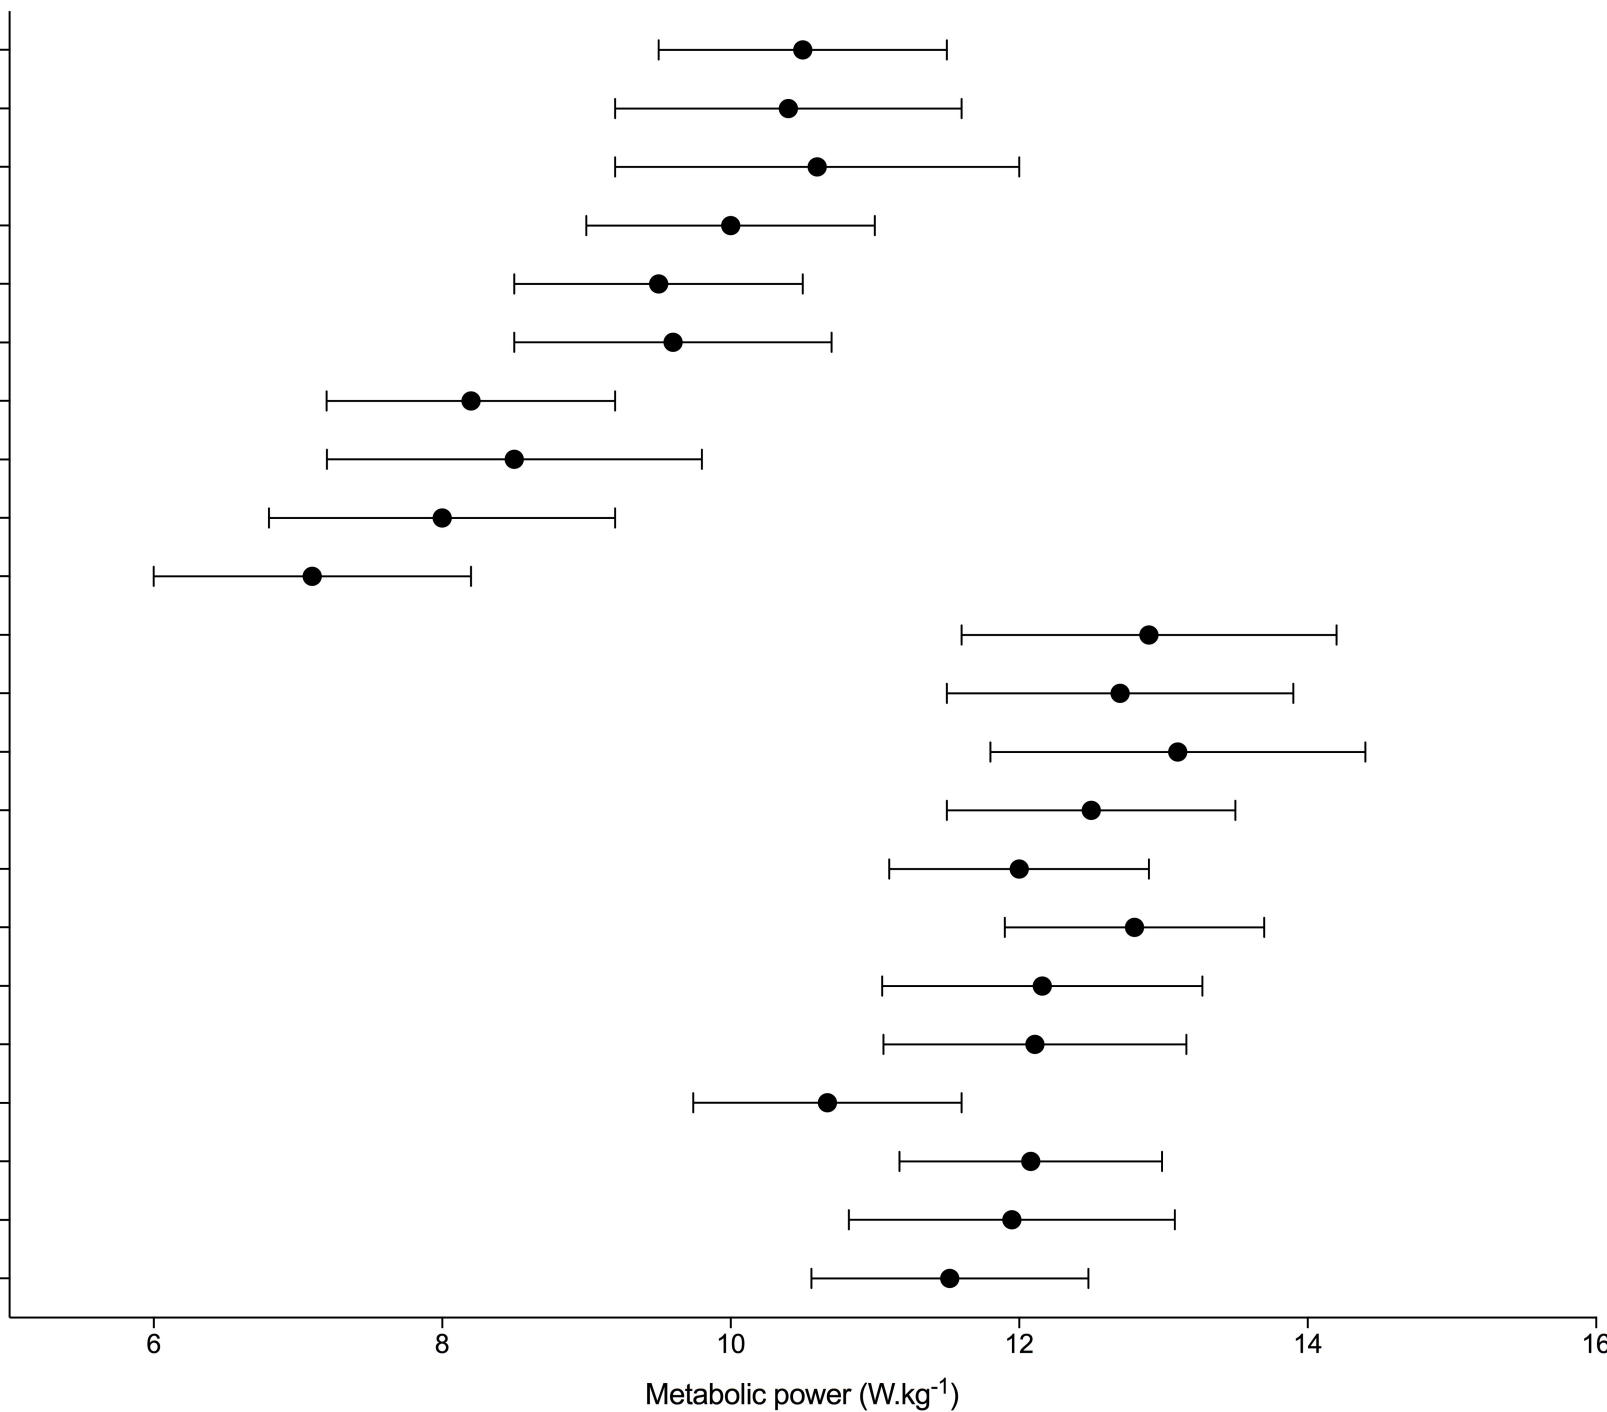

Supplement: Supplementary file 3 — Figure S3. Duration-specific peak metabolic power (W·kg-1) in the football codes. a = 2-minutes, b = 3-minutes, c = 4-minutes, d = 6-minutes, e = 7-minutes, f = 8-minutes, g = 9-minutes. Data expressed as mean ± SD. RL = rugby league, RU = rugby union, AF = Australian Football, R7 = rugby sevens [file 40279_2018_965_MOESM3_ESM.pdf]
